# Supplementary material for: Ruthenium nanoparticle catalyzed selective reductive amination of imine with aldehyde to access tertiary amines
Source: Royal Society of Chemistry journal article supplement (doi:10.1039/c8cc05437a), 2018-01-01

## Electronic Supporting Information

### Table of Contents

|     |                                                                              |
|-----|------------------------------------------------------------------------------|
| S2  | <i>General remarks</i>                                                       |
| S2  | <i>Preparation of the Ru-OMC catalyst</i>                                    |
| S3  | <i>Characterization of Ru-OMC catalysts</i>                                  |
| S3  | <i>General procedures for Ru-OMC catalyzed reductive amination reactions</i> |
| S4  | <i>Characterization data of substrates</i>                                   |
| S10 | <i><sup>1</sup>H and <sup>13</sup>C NMR Spectra</i>                          |

### **General remarks**

All reagents were obtained from commercial sources and used as received. Pluronic F-127 (Mw = 12,600, EO106PO70EO106) was supplied by Sigma-Aldrich Co. LLC. Technical grade petroleum ether (40-60°C bp.) and ethyl acetate were used for chromatography column.

The images of surface morphologies and the energy-dispersive spectrometry (EDS) spectra were acquired by scanning electron microscope (SEM) with FEI Quanta 400 FEG. The structure and crystallinity of the as-synthesized catalysts was tested by powder X-ray diffraction (XRD) analysis on a D8 Advance diffractometer (Bruker, Germany). X-ray photoelectron spectra (XPS) was analyzed on the Thermo ESCALAB 250XI instrument.

<sup>1</sup>H NMR spectra were recorded in CDCl<sub>3</sub> at ambient temperature on Bruker AVANCE I 300 or 400 spectrometers at 300.1 or 400.1 MHz, using the solvent as internal standard (7.26 ppm). <sup>13</sup>C NMR spectra were obtained at 75 MHz and referenced to the internal solvent signals (central peak is 77.2 ppm). Chemical shift ( $\delta$ ) and coupling constants ( $J$ ) are given in ppm and in Hz, respectively. The peak patterns are indicated as follows: s, singlet; d, doublet; t, triplet; q, quartet; m, multiplet, and br. for broad.

GC analyses were performed with GC-14C (Shimadzu) equipped with a 30-m capillary column (Supelco, SPB-5, fused silica capillary column, 30 M\*0.25 mm\*0.25 mm film thickness), was used with N<sub>2</sub>/air as vector gas. GCMS were measured by GCMS-7890A-5975C (Agilent) with GC-7890A equipped with a 30-m capillary column (HP-5ms, fused silica capillary column, 30 M\*0.25 mm\*0.25 mm film thickness), was used with helium as vector gas.

The following GC conditions were used: initial temperature 80 °C, for 2 minutes, then rate 20 °C/min. until 260 °C and 260°C for 20 minutes.

### **Preparation of the Ru-OMC catalyst**

During the fabrication process of catalysts, 9.45 g Pluronic F127 was firstly dissolved in ethanol solution under stirred conditions to form a transparent solution A. Then, 16.5 g resorcinol was completely dissolved in water and obtained solution was slowly added in the solution A and continuously stirred to obtain solution B. Subsequently, 13.5 g formaldehyde (37 wt%) was added to solution B slowly. After stirring for 30 min, 2.3 ml HCl was added slowly as a catalyst to solution B, and the mixtures was stirred continuously for 6 h. The obtained precursor solution presents two separated phases, the upper transparent phase was discarded, while the lower yellow phase was considered as polymer-rich resorcinol formaldehyde resin precursor. The RuCl<sub>3</sub> was then added to this precursor with 5 wt% Ru contents. Finally, the precursors with different Ru contents were dried in an oven at 90 °C for 12 h. The resulted polymers were then carbonized at 1000 °C for 2 h with a heating rate 2 °C/min under a N<sub>2</sub> atmosphere with the flow rate of 80 mL/min. Finally, the Ru-OMC catalysts were obtained after cooling down the materials to room temperature. The obtained catalysts were denoted as Ru-OMC.

### Characterization of Ru-OMC catalysts

The images of surface morphologies and the energy-dispersive spectrometry (EDS) spectra were acquired by scanning electron microscope (SEM) with FEI Quanta 400 FEG. The structure and crystallinity of the as-synthesized catalysts was tested by powder X-ray diffraction (XRD) analysis on a D8 Advance diffractometer (Bruker, Germany) in the  $2\theta$  range of  $10^\circ\sim 80^\circ$ . Small-angle XRD was also performed at  $2\theta$  from  $0.5^\circ$  to  $5^\circ$ . X-ray photoelectron spectra (XPS) was analyzed on the Thermo ESCALAB 250XI instrument using Al K $\alpha$  ( $h\nu = 1486.6$  eV) from an X-ray source operating at 15 kV and 10 mA. The C(1s) line at 284.6 eV was used as the binding energy reference.

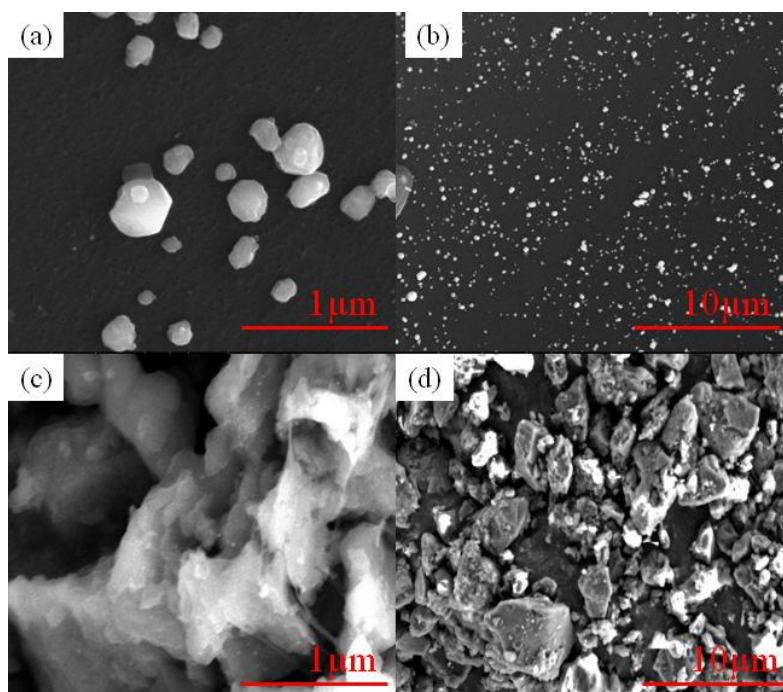

**Fig. S1.** The SEM micrographs of (a), (b) as-synthesized Ru-OMC catalyst and (c), (d) reused for 14 times.

### General procedure for Ru-OMC catalyzed selective reductive aminations of aldehydes with imines

Ru-OMC (5 wt%, 1 mol%, 20 mg), imine (0.5 mmol), aldehyde (0.75 mmol), PhSiH<sub>3</sub> (0.75 mmol, 90  $\mu$ L) and MeOH (2 mL) were introduced in a tube under air, equipped with magnetic stirring bar and was stirred at 40  $^\circ$ C. After 16 h, the conversion of the reaction was analyzed by gas chromatography. The solvent was then evaporated under vacuum and the desired product was purified by using a silica gel chromatography column and a mixture of petrol ether/ethyl acetate as eluent.

## Characterization data of substrates

### *N*-benzyl-4-methoxy-*N*-benzylaniline<sup>1</sup> (3a)

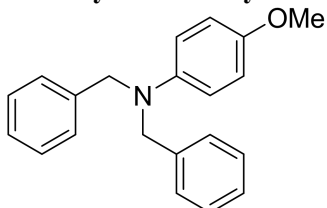

Light green solid, yield = 82%, 124 mg, <sup>1</sup>H NMR (300 MHz, CDCl<sub>3</sub>): δ = 7.41-7.28 (m, 10H), 6.85-6.76 (m, 4H), 4.64 (s, 4H), 3.79 (s, 3H). <sup>13</sup>C{<sup>1</sup>H} NMR (75 MHz, CDCl<sub>3</sub>): δ = 151.8, 143.9, 139.1, 128.7, 127.1, 127.0, 114.8, 114.6, 55.8, 55.3. MS (EI): m/z: 303 (70, M<sup>+</sup>), 212 (70), 91 (100), 65 (20).

### *N*-benzyl-*N*-(2-ethylbutyl)-4-methoxyaniline (3b)

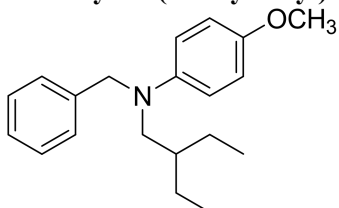

Colorless solid, yield = 85%, 126 mg, <sup>1</sup>H NMR (300 MHz, CDCl<sub>3</sub>): δ = 7.35-7.22 (m, 5H), 6.81 (d, 2H, *J* = 9.3 Hz), 6.70 (d, 2H, *J* = 9.0 Hz), 4.53 (s, 2H), 3.77 (s, 3H), 3.24 (d, 2H, *J* = 7.2 Hz), 1.75-1.73 (m, 1H), 1.49-1.30 (m, 4H), 0.91 (t, 6H, *J* = 7.5 Hz). <sup>13</sup>C{<sup>1</sup>H} NMR (75 MHz, CDCl<sub>3</sub>): δ = 151.4, 143.9, 139.5, 128.6, 127.1, 126.7, 114.8, 114.7, 56.6, 56.3, 55.9, 39.4, 23.7, 10.9.

### *N,N*-dibenzylaniline<sup>2</sup> (3c)

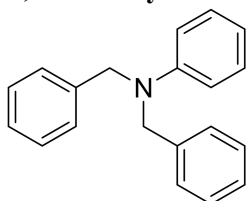

Colorless solid, yield = 86%, 117 mg, <sup>1</sup>H NMR (300 MHz, CDCl<sub>3</sub>): δ = 7.42-7.21 (m, 12H), 6.82-6.75 (m, 3H), 4.72 (s, 4H). <sup>13</sup>C{<sup>1</sup>H} NMR (75 MHz, CDCl<sub>3</sub>): δ = 149.3, 138.7, 129.4, 128.8, 127.0, 126.8, 116.9, 112.6, 54.3. MS (EI): m/z: 273 (30, M<sup>+</sup>), 196 (25), 182 (25), 91 (100), 65 (10).

### *N*-benzyl-*N*-(4-methylbenzyl)aniline<sup>1</sup> (3d)

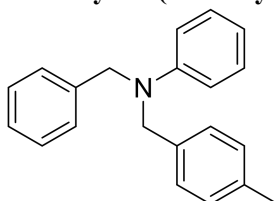

Orange solid, yield = 58%, 83 mg, <sup>1</sup>H NMR (300 MHz, CDCl<sub>3</sub>): δ = 7.39-7.19 (m, 11H), 6.81-6.75 (m, 3H), 4.69 (s, 4H), 2.412 (s, 3H). <sup>13</sup>C{<sup>1</sup>H} NMR (75 MHz, CDCl<sub>3</sub>): δ = 149.3, 138.7, 136.5, 135.5, 129.4, 129.3, 128.7, 126.9, 126.7, 124.5, 116.8, 112.6, 54.2, 54.0, 21.1. MS (EI): m/z: 287 (40, M<sup>+</sup>), 196 (10), 105 (100), 91 (55), 77 (35).

### *N*-benzyl-*N*-(2-methylbenzyl)aniline<sup>1</sup> (3e)

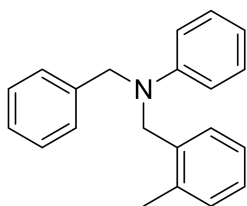

White solid, yield = 45%, 65 mg,  $^1\text{H}$  NMR (300 MHz,  $\text{CDCl}_3$ ):  $\delta$  = 7.37-7.22 (m, 11H), 6.74-6.72(m, 3H), 4.72 (s, 2H), 4.62 (s, 2H), 2.32 (s, 3H).  $^{13}\text{C}\{^1\text{H}\}$  NMR (75 MHz,  $\text{CDCl}_3$ ):  $\delta$  = 149.2, 138.7, 135.7, 130.5, 129.4, 128.8, 127.0, 126.9, 126.8, 126.3, 126.1, 116.8, 116.6, 112.4, 54.3, 52.5, 19.1. MS (EI): m/z: 287 (45,  $\text{M}^+$ ), 183 (90), 105 (100), 91 (80), 77 (50).

***N*-benzyl-*N*-(4-bromobenzyl)aniline<sup>1</sup> (3f)**

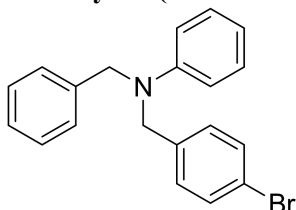

Green solid, yield = 62%, 109 mg,  $^1\text{H}$  NMR (300 MHz,  $\text{CDCl}_3$ ):  $\delta$  = 7.51-7.17 (m, 11H), 6.80-6.77 (m, 3H), 4.69 (s, 2H), 4.64 (s, 2H).  $^{13}\text{C}\{^1\text{H}\}$  NMR (75 MHz,  $\text{CDCl}_3$ ):  $\delta$  = 149.0, 138.4, 137.8, 131.9, 129.4, 128.8, 128.6, 127.2, 126.9, 120.8, 117.3, 112.8, 54.5, 53.9. MS (EI): m/z: 351 (30,  $\text{M}^+$ ), 207 (10), 169 (35), 91 (100), 77 (55).

***N*-benzyl-*N*-(4-fluorobenzyl)aniline<sup>1</sup> (3g)**

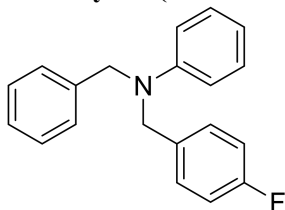

Light yellow solid, yield = 83%, 121 mg,  $^1\text{H}$  NMR (300 MHz,  $\text{CDCl}_3$ ):  $\delta$  = 7.38-7.21 (m, 9H), 7.09-7.03 (m, 2H), 6.81-6.78 (m, 3H), 4.69 (s, 2H), 4.66 (s, 2H).  $^{13}\text{C}\{^1\text{H}\}$  NMR (75 MHz,  $\text{CDCl}_3$ ):  $\delta$  = 163.7 (d,  $J_{\text{CF}} = 243.1\text{Hz}$ ), 149.2, 138.6, 134.3, 129.4, 128.8, 128.5 (d,  $J_{\text{CF}} = 7.9\text{Hz}$ ), 127.1, 126.9, 117.2, 115.8 (d,  $J_{\text{CF}} = 21.3\text{Hz}$ ), 112.8, 54.4, 53.8. MS (EI): m/z: 291 (50,  $\text{M}^+$ ), 200 (10), 109 (100), 91 (80), 77 (25).

***N*-benzyl-*N*-(2-fluorobenzyl)aniline<sup>1</sup> (3h)**

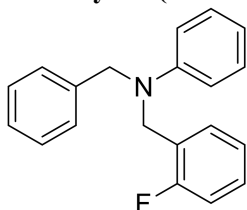

White solid, yield = 78%, 113 mg,  $^1\text{H}$  NMR (300 MHz,  $\text{CDCl}_3$ ):  $\delta$  = 7.41-7.10 (m, 11H), 6.79-6.76 (m, 3H), 4.77 (s, 2H), 4.73 (s, 2H).  $^{13}\text{C}\{^1\text{H}\}$  NMR (75 MHz,  $\text{CDCl}_3$ ):  $\delta$  = 162.59 (d,  $J_{\text{CF}} = 243.75\text{Hz}$ ), 148.7, 138.4, 139.3, 128.7, 128.5, 128.4, 127.0, 126.7, 125.4 (d,  $J_{\text{CF}} = 13.5\text{Hz}$ ), 124.2 (d,  $J_{\text{CF}} = 3.75\text{Hz}$ ), 117.0, 115.5 (d,  $J_{\text{CF}} = 21.0\text{Hz}$ ), 112.5, 54.5, 48.5. MS (EI): m/z: 291 (45,  $\text{M}^+$ ), 200 (35), 109 (55), 91 (100), 77 (35).

***N*-benzyl-*N*-(2-chlorobenzyl)aniline<sup>1</sup> (3i)**

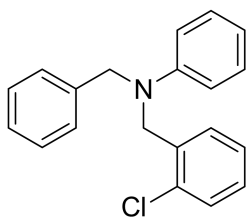

White solid, yield = 51%, 78 mg,  $^1\text{H}$  NMR (300 MHz,  $\text{CDCl}_3$ ):  $\delta$  = 7.45-7.19 (m, 11H), 6.79-6.70 (m, 3H), 4.75 (s, 2H), 4.74 (s, 2H).  $^{13}\text{C}\{^1\text{H}\}$  NMR (75 MHz,  $\text{CDCl}_3$ ):  $\delta$  = 148.7, 138.4, 135.5, 133.2, 129.8, 129.4, 128.9, 128.3, 127.9, 127.2, 127.1, 126.8, 117.2, 112.5, 54.7, 52.8. MS (EI): m/z: 307 (50,  $\text{M}^+$ ), 180 (15), 125 (55), 91 (100), 77 (50).

### N-benzyl-N-pentylaniline<sup>3</sup> (3j)

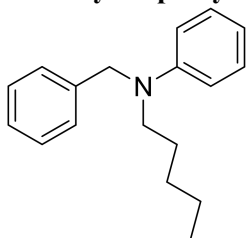

Light yellow oil, yield = 72%, 91 mg,  $^1\text{H}$  NMR (300 MHz,  $\text{CDCl}_3$ ):  $\delta$  = 7.40-7.22 (m, 7H), 6.76-6.70 (m, 3H), 4.61 (s, 2H), 3.45 (t, 2H,  $J$  = 7.5 Hz), 1.79-1.69 (m, 2H), 1.47-1.34 (m, 4H), 0.98 (t, 3H,  $J$  = 6.6 Hz).  $^{13}\text{C}\{^1\text{H}\}$  NMR (75 MHz,  $\text{CDCl}_3$ ):  $\delta$  = 148.7, 139.3, 129.3, 128.7, 126.9, 126.7, 116.0, 112.2, 54.6, 51.5, 29.5, 27.0, 22.8, 14.3. MS (EI): m/z: 253 (20,  $\text{M}^+$ ), 196 (65), 91 (100), 77 (15).

### N-benzyl-N-(thiophen-2-ylmethyl)aniline<sup>1</sup> (3k)

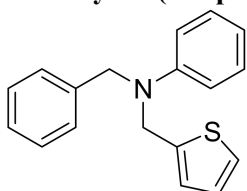

Light yellow oil, yield = 68%, 95 mg,  $^1\text{H}$  NMR (300 MHz,  $\text{CDCl}_3$ ):  $\delta$  = 7.43-7.25 (m, 8H), 7.04-6.80 (m, 5H), 4.82 (s, 2H), 4.69 (s, 2H).  $^{13}\text{C}\{^1\text{H}\}$  NMR (75 MHz,  $\text{CDCl}_3$ ):  $\delta$  = 148.8, 142.6, 138.6, 129.4, 128.8, 127.1, 127.0, 126.9, 125.2, 124.5, 117.6, 113.5, 54.2, 50.0. MS (EI): m/z: 279 (50,  $\text{M}^+$ ), 97 (100), 77 (20), 51 (10).

### N-benzyl-N-(furan-2-ylmethyl)aniline (3l)

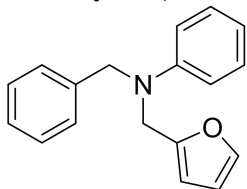

Light yellow oil, yield = 71%, 93 mg,  $^1\text{H}$  NMR (300 MHz,  $\text{CDCl}_3$ ):  $\delta$  = 7.42-7.27 (m, 8H), 6.92-6.80 (m, 3H), 6.42-6.31 (m, 1H), 6.28-6.19 (m, 1H), 4.68 (s, 2H), 4.60 (s, 2H).  $^{13}\text{C}\{^1\text{H}\}$  NMR (75 MHz,  $\text{CDCl}_3$ ):  $\delta$  = 152.4, 149.0, 142.1, 138.8, 129.3, 128.8, 127.1, 126.9, 117.3, 113.1, 110.4, 107.6, 54.4, 47.8. MS (EI): m/z: 263 (75,  $\text{M}^+$ ), 220 (15), 91 (50), 81 (100).

### N-benzyl-N-((3-chloropyridin-4-yl)methyl)aniline (3m)

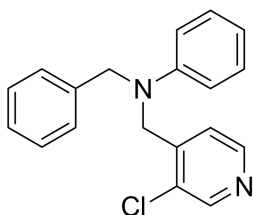

Light yellow solid, yield = 55%, 85 mg,  $^1\text{H}$  NMR (300 MHz,  $\text{CDCl}_3$ ):  $\delta$  = 8.34-8.35 (m, 1H), 7.58 (d, 1H,  $J$  = 7.6 Hz), 7.20-7.41 (m, 8H), 6.68-6.81 (m, 3H), 4.72 (s, 2H), 4.70 (s, 2H).  $^{13}\text{C}\{^1\text{H}\}$  NMR (75 MHz,  $\text{CDCl}_3$ ):  $\delta$  = 150.3, 148.3, 148.1, 138.0, 136.8, 132.4, 129.6, 129.0, 127.3, 126.7, 122.8, 117.6, 112.4, 54.8, 52.2. MS (EI):  $m/z$ : 308 (60,  $\text{M}^+$ ), 231 (20), 126 (25), 91 (100), 65 (10).

**N-(furan-2-ylmethyl)-N-(4-methoxybenzyl)aniline (3n)**

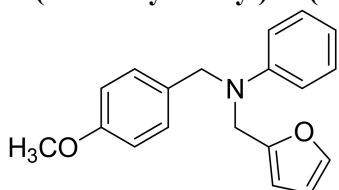

Light yellow oil, yield = 69%, 101 mg,  $^1\text{H}$  NMR (300 MHz,  $\text{CDCl}_3$ ):  $\delta$  = 7.42-7.41 (m, 1H), 7.29-7.22 (m, 4H), 6.94-6.89 (m, 4H), 6.79 (t, 1H,  $J$  = 7.2 Hz), 6.37-6.35 (m, 1H), 6.22-6.21 (m, 1H), 4.60 (s, 2H), 4.56 (s, 2H), 3.85 (s, 3H).  $^{13}\text{C}\{^1\text{H}\}$  NMR (75 MHz,  $\text{CDCl}_3$ ):  $\delta$  = 158.8, 152.5, 149.0, 142.0, 130.6, 129.3, 128.1, 117.3, 114.1, 113.2, 110.4, 107.6, 55.4, 53.8, 47.6. MS (EI):  $m/z$ : 293 (35,  $\text{M}^+$ ), 121 (100), 81 (10).

**N-(4-methoxybenzyl)-N-pentylaniline (3o)**

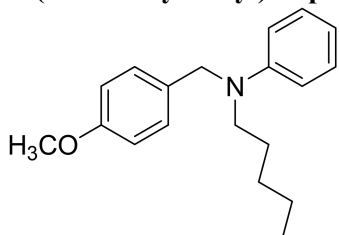

Light yellow oil, yield = 77%, 109 mg,  $^1\text{H}$  NMR (300 MHz,  $\text{CDCl}_3$ ):  $\delta$  = 7.28-7.20 (m, 4H), 6.94-6.90 (m, 2H), 6.77-6.71 (m, 3H), 4.55 (s, 2H), 3.85 (s, 3H), 1.78-1.68 (m, 2H), 1.47-1.36 (m, 4H), 0.99 (t, 3H,  $J$  = 6.6 Hz).  $^{13}\text{C}\{^1\text{H}\}$  NMR (75 MHz,  $\text{CDCl}_3$ ):  $\delta$  = 158.6, 148.8, 131.1, 129.3, 127.8, 116.0, 114.1, 112.3, 55.4, 54.0, 51.3, 29.5, 26.9, 22.7, 14.3. MS (EI):  $m/z$ : 283 (20,  $\text{M}^+$ ), 226 (10), 121 (100), 77 (15).

**N,N-dibenzyl-4-bromoaniline<sup>4</sup> (3p)**

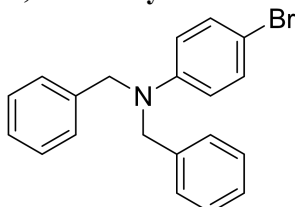

Brown solid, yield = 33%, 58 mg,  $^1\text{H}$  NMR (300 MHz,  $\text{CDCl}_3$ ):  $\delta$  = 7.44-7.29 (m, 12H), 6.69 (d, 2H,  $J$  = 8.7 Hz), 4.71 (s, 4H).  $^{13}\text{C}\{^1\text{H}\}$  NMR (75 MHz,  $\text{CDCl}_3$ ):  $\delta$  = 148.2, 138.1, 132.0, 128.9, 127.2, 126.7, 114.4, 108.8, 54.6. MS (EI):  $m/z$ : 351 (20,  $\text{M}^+$ ), 260 (5), 91 (100), 65 (20).

**N-benzyl-4-bromo-N-(4-methylbenzyl)aniline<sup>1</sup> (3q)**

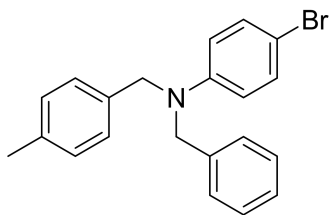

Light yellow solid, yield = 50%, 92 mg,  $^1\text{H}$  NMR (300 MHz,  $\text{CDCl}_3$ ):  $\delta$  = 7.46-7.20 (m, 11H), 6.70 (d, 2H,  $J$  = 8.7 Hz), 4.72 (s, 2H), 4.70 (s, 2H), 2.45 (s, 3H).  $^{13}\text{C}\{^1\text{H}\}$  NMR (75 MHz,  $\text{CDCl}_3$ ):  $\delta$  = 148.2, 138.2, 136.8, 134.9, 131.9, 129.6, 128.9, 127.2, 126.7, 114.3, 108.7, 54.5, 54.3, 21.2. MS (EI):  $m/z$ : 365 (20,  $\text{M}^+$ ), 207 (5), 105 (100), 91, (45), 77 (20).

**Methyl 4-((benzyl(*p*-tolyl)amino)methyl)benzoate<sup>1</sup> (3r)**

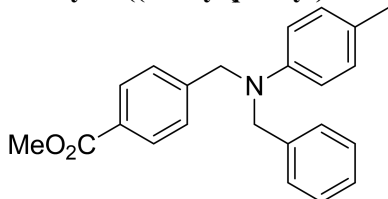

White solid, yield = 66%, 114 mg,  $^1\text{H}$  NMR (300 MHz,  $\text{CDCl}_3$ ):  $\delta$  = 8.01 (d, 2H,  $J$  = 7.8 Hz), 7.36-7.29 (m, 7H), 7.01 (d, 2H,  $J$  = 8.1 Hz), 6.67 (d, 2H,  $J$  = 8.7 Hz), 4.67 (s, 2H), 4.65 (s, 2H), 3.93 (s, 3H), 2.26 (s, 3H).  $^{13}\text{C}\{^1\text{H}\}$  NMR (75 MHz,  $\text{CDCl}_3$ ):  $\delta$  = 167.1, 146.9, 144.7, 138.7, 130.1, 129.9, 129.0, 128.8, 127.1, 126.9, 126.8, 126.5, 113.0, 54.9, 54.6, 52.2, 20.4. MS (EI):  $m/z$ : 345 (45,  $\text{M}^+$ ), 253 (10), 195 (25), 91 (100), 65 (25).

**N-((5-methylthiophen-2-yl)methyl)-N-pentylaniline (3s)**

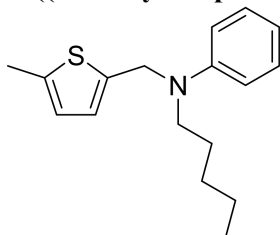

Light yellow oil, yield = 74%, 106 mg,  $^1\text{H}$  NMR (300 MHz,  $\text{CDCl}_3$ ):  $\delta$  = 7.29-7.25 (m, 2H), 6.83-6.62 (m, 5H), 4.63 (s, 2H), 3.39 (t, 2H,  $J$  = 7.6 Hz), 2.47 (s, 3H), 1.70-1.68 (m, 2H), 1.43-1.39 (m, 4H), 0.98 (t, 3H,  $J$  = 7.2 Hz).  $^{13}\text{C}\{^1\text{H}\}$  NMR (75 MHz,  $\text{CDCl}_3$ ):  $\delta$  = 148.4, 140.6, 138.7, 129.3, 124.8, 124.5, 116.6, 112.8, 51.0, 50.3, 29.5, 27.1, 22.8, 15.5, 14.3. MS (EI):  $m/z$ : 273 (25,  $\text{M}^+$ ), 216 (10), 111 (100), 77 (15).

**Tribenzylamine<sup>5</sup> (3t)**

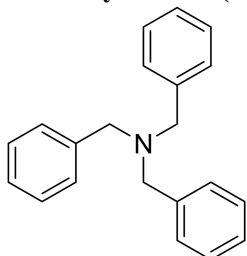

Light yellow solid, yield = 64%, 92 mg,  $^1\text{H}$  NMR (300 MHz,  $\text{CDCl}_3$ ):  $\delta$  = 7.51-7.29 (m, 15H), 3.65 (s, 6H).  $^{13}\text{C}\{^1\text{H}\}$  NMR (75 MHz,  $\text{CDCl}_3$ ):  $\delta$  = 139.8, 128.9, 128.4, 127.0, 58.1. MS (EI):  $m/z$ : 287 (30,  $\text{M}^+$ ), 210 (35), 91 (100), 65 (15).

***N,N*-dibenzyl-2-methylpropan-1-amine<sup>6</sup> (3u)**



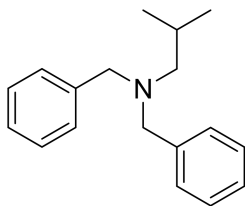

Light yellow solid, yield = 80%, 101 mg,  $^1\text{H}$  NMR (300 MHz,  $\text{CDCl}_3$ ):  $\delta$  = 7.53-7.32 (m, 10H), 3.65 (s, 4H), 2.29 (d, 2H,  $J$  = 7.5 Hz), 2.05-1.96 (m, 1H), 1.02-0.99 (m, 6H).  $^{13}\text{C}\{^1\text{H}\}$  NMR (75 MHz,  $\text{CDCl}_3$ ):  $\delta$  = 140.2, 129.0, 128.3, 126.9, 62.4, 59.0, 26.3, 21.0. MS (EI):  $m/z$ : 253 (5,  $\text{M}^+$ ), 210 (60), 91 (100), 65 (15).

## References

- 1 B. Li, J. Yu, C. Li, Y. Li, J. Luo and Y. Shao, *Tetrahedron Lett.*, 2017, **58**, 137.
- 2 Y. Yoshida, S. Otsuka, K. Nogi and H. Yorimitsu, *Org. Lett.*, 2018, **20**, 1134.
- 3 S. Pang, Y. Deng and F. Shi, *Chem. Commun.*, 2015, **51**, 9471.
- 4 Y. Fukami, T. Wada, T. Meguro, N. Chida, T. Sato, *Org. Biomol. Chem.*, 2016, **14**, 5486.
- 5 S. E. Varjosaari, V. Skrypai, P. Suating, J. J. M. Hurley, A. M. D. Lio, T. M. Gilbert and M. J. Adler, *Adv. Synth. Catal.*, 2017, **359**, 1872.
- 6 S.-H. Xiang, J. Xu, H.-Q. Yuan and P.-Q. Huang, *Synlett*, 2010, **12**, 1829.

***N*-benzyl-4-methoxy-*N*-benzylaniline (3a)**

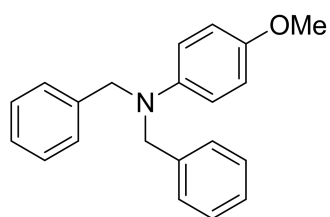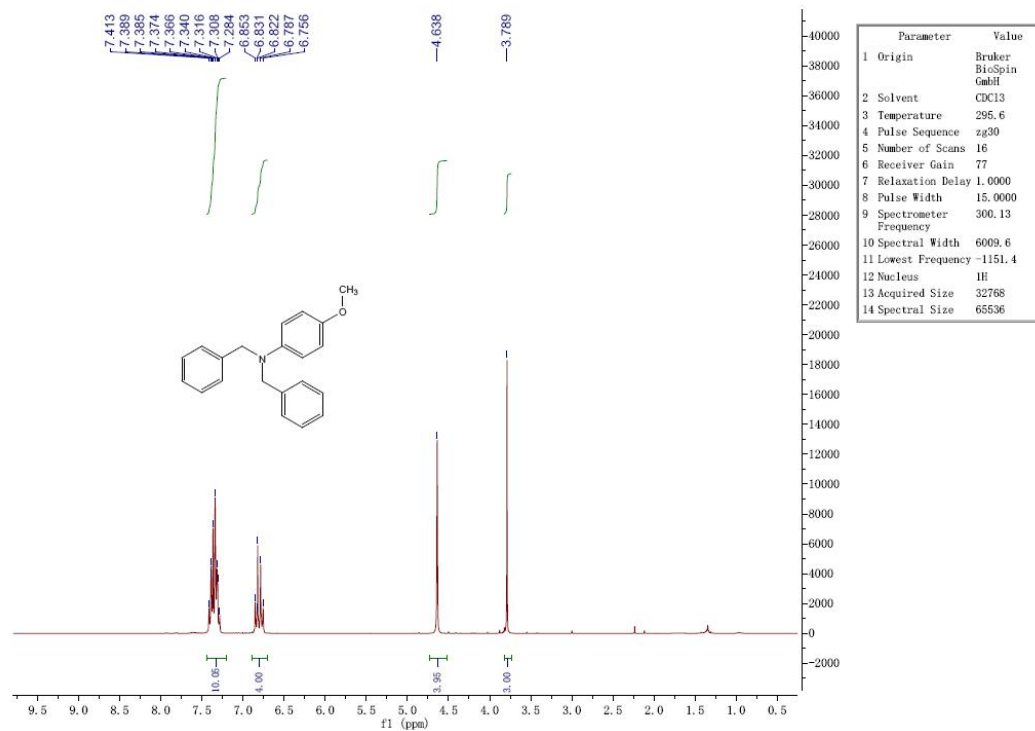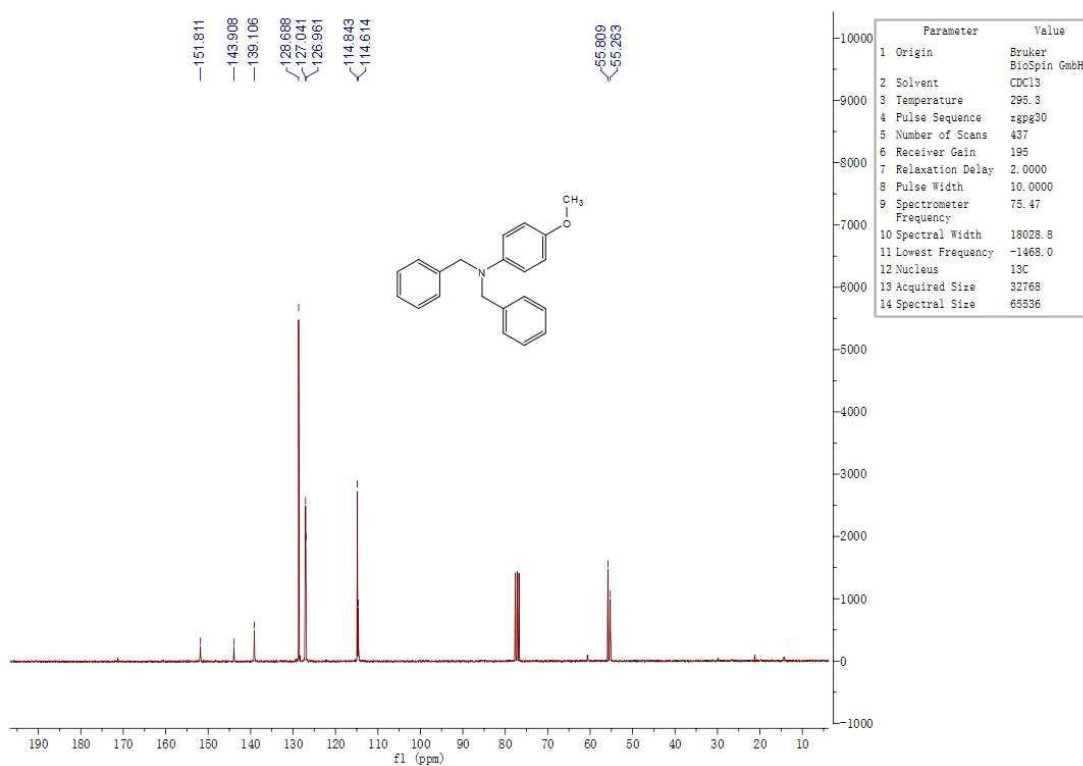

# N-benzyl-N-(2-ethylbutyl)-4-methoxyaniline (3b)

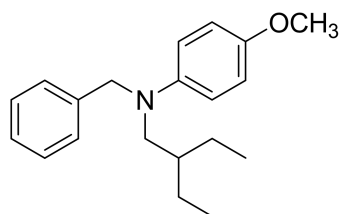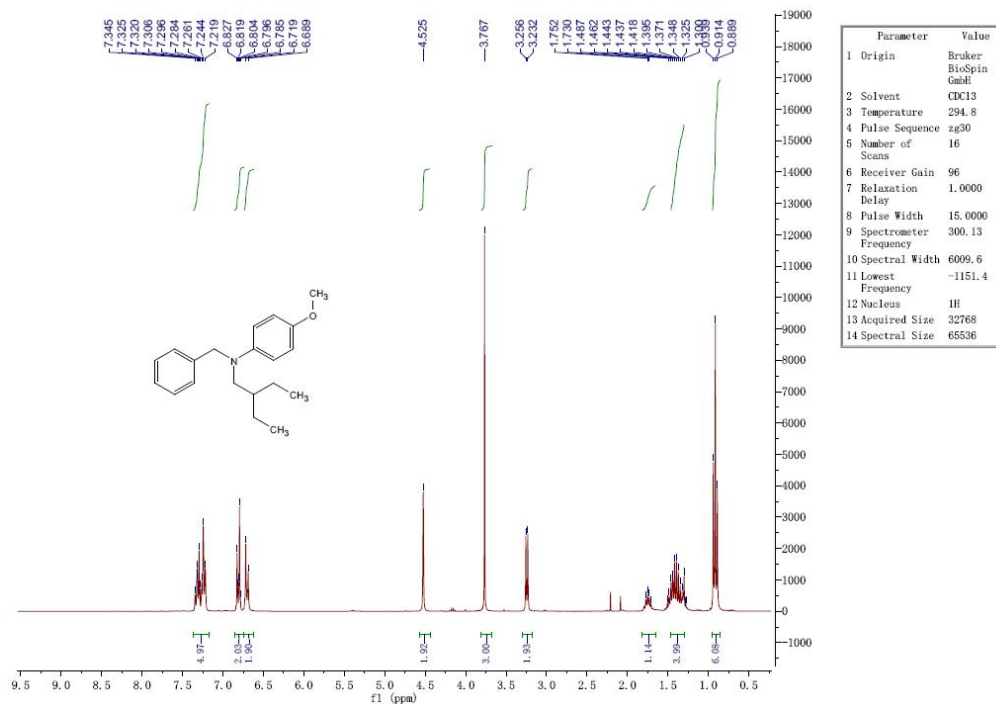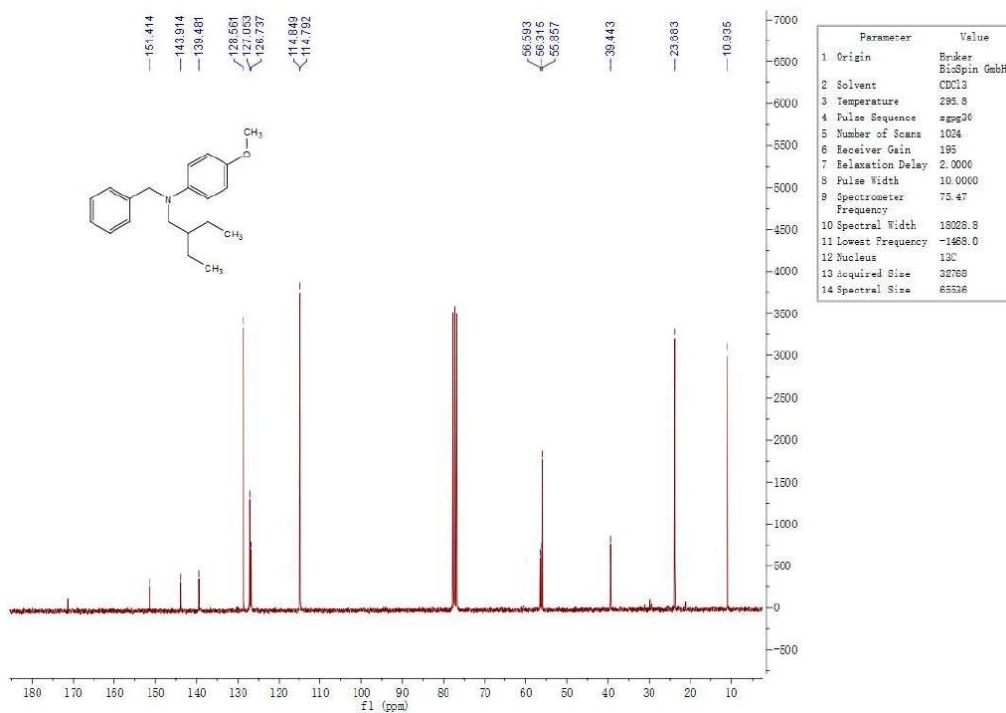

# N,N-dibenzylaniline (3c)

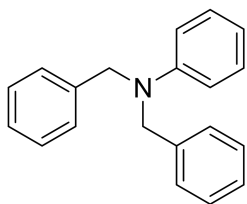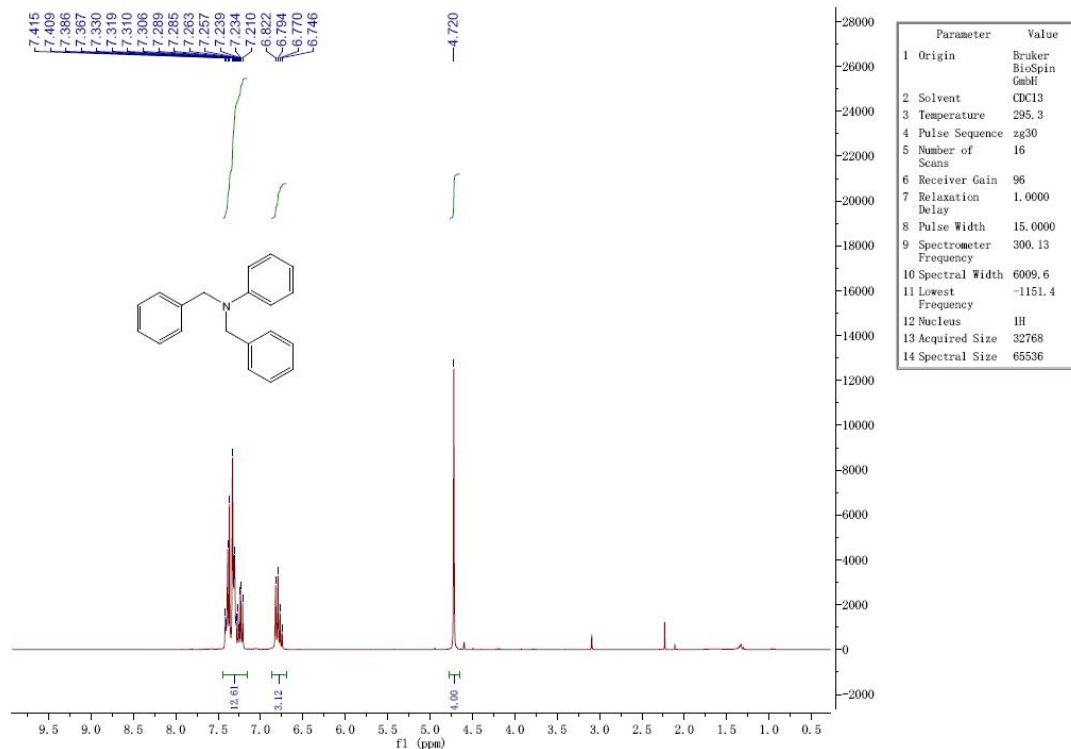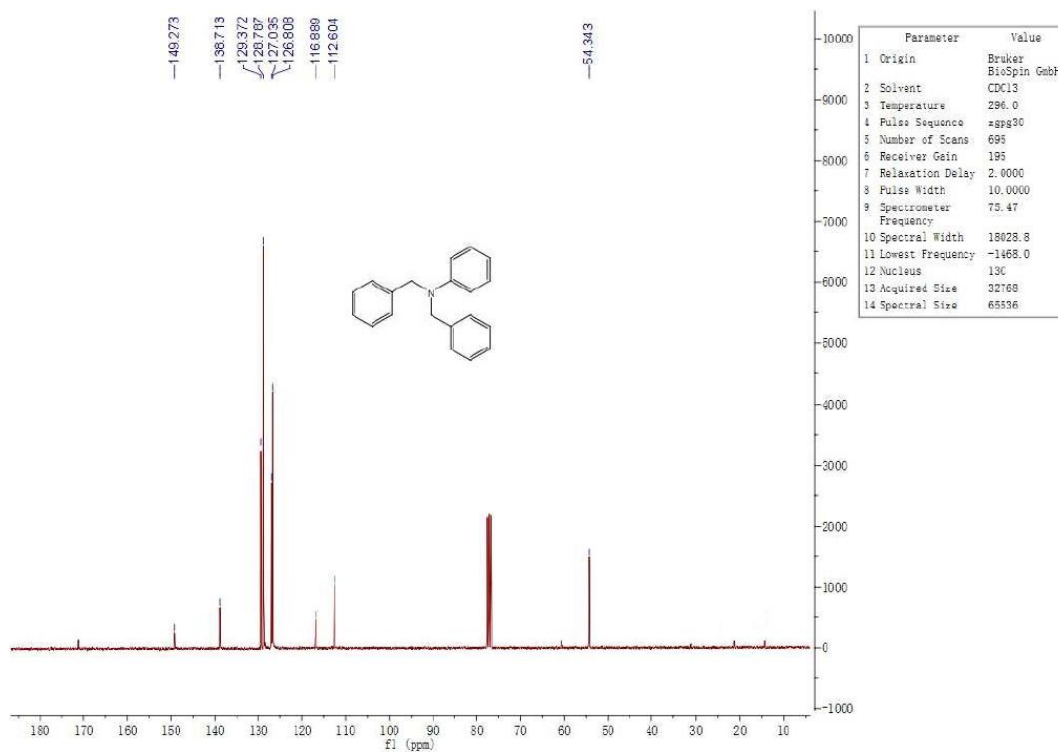

# N-benzyl-N-(4-methylbenzyl)aniline (3d)

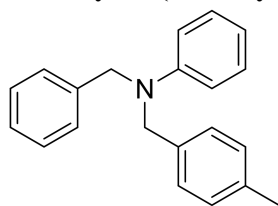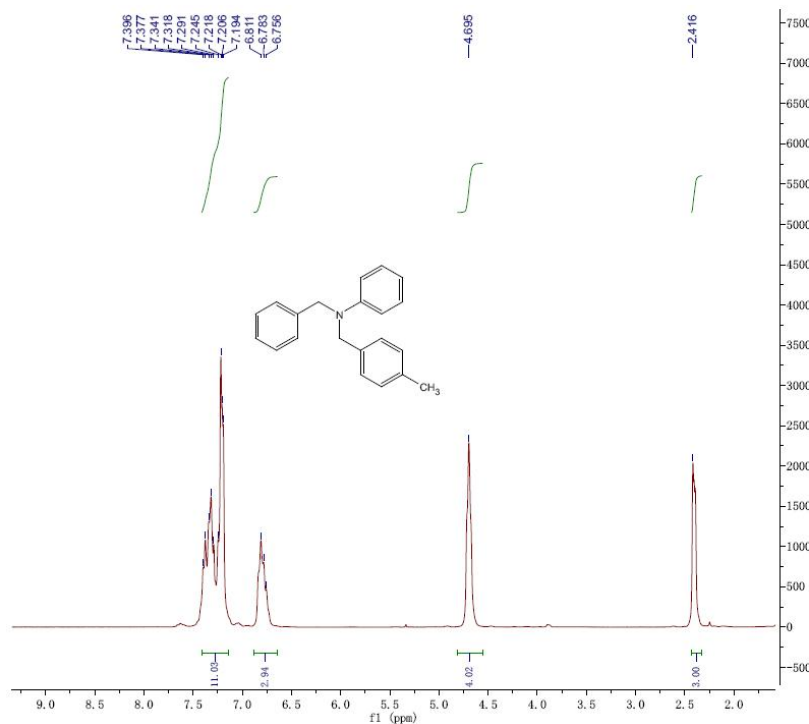

| Parameter           | Value               |
|---------------------|---------------------|
| 1 Origin            | Bruker BioSpin GmbH |
| 2 Solvent           | CDCl3               |
| 3 Temperature       | 297.1               |
| 4 Pulse Sequence    | zg30                |
| 5 Number of Scans   | 16                  |
| 6 Receiver Gain     | 96                  |
| 7 Relaxation Delay  | 1.0000              |
| 8 Pulse Width       | 15.0000             |
| 9 Spectrometer      | 300.13              |
| Frequency           |                     |
| 10 Spectral Width   | 6909.6              |
| 11 Lowest Frequency | -1151.4             |
| 12 Nucleus          | 1H                  |
| 13 Acquired Size    | 32768               |
| 14 Spectral Size    | 65536               |

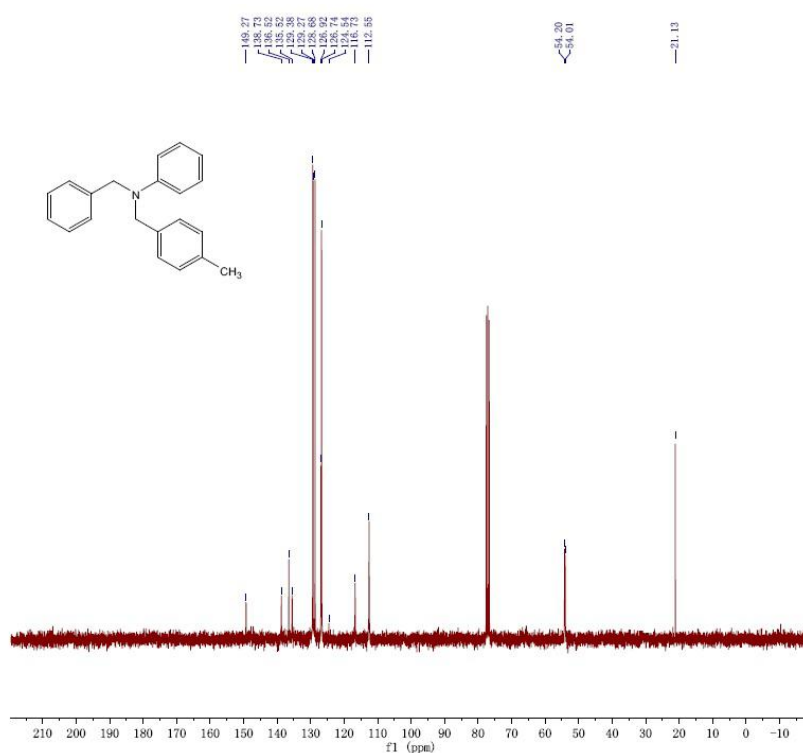

| Parameter           | Value               |
|---------------------|---------------------|
| 1 Origin            | Bruker BioSpin GmbH |
| 2 Solvent           | CDCl3               |
| 3 Temperature       | 299.1               |
| 4 Pulse Sequence    | zgpg30              |
| 5 Number of Scans   | 123                 |
| 6 Receiver Gain     | 195                 |
| 7 Relaxation Delay  | 2.0000              |
| 8 Pulse Width       | 10.0000             |
| 9 Spectrometer      | 75.47               |
| Frequency           |                     |
| 10 Spectral Width   | 18028.8             |
| 11 Lowest Frequency | -1468.0             |
| 12 Nucleus          | 13C                 |
| 13 Acquired Size    | 32768               |
| 14 Spectral Size    | 65536               |

### N-benzyl-N-(2-methylbenzyl)aniline (3e)

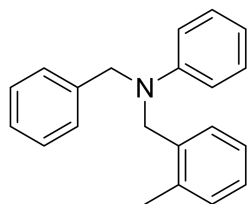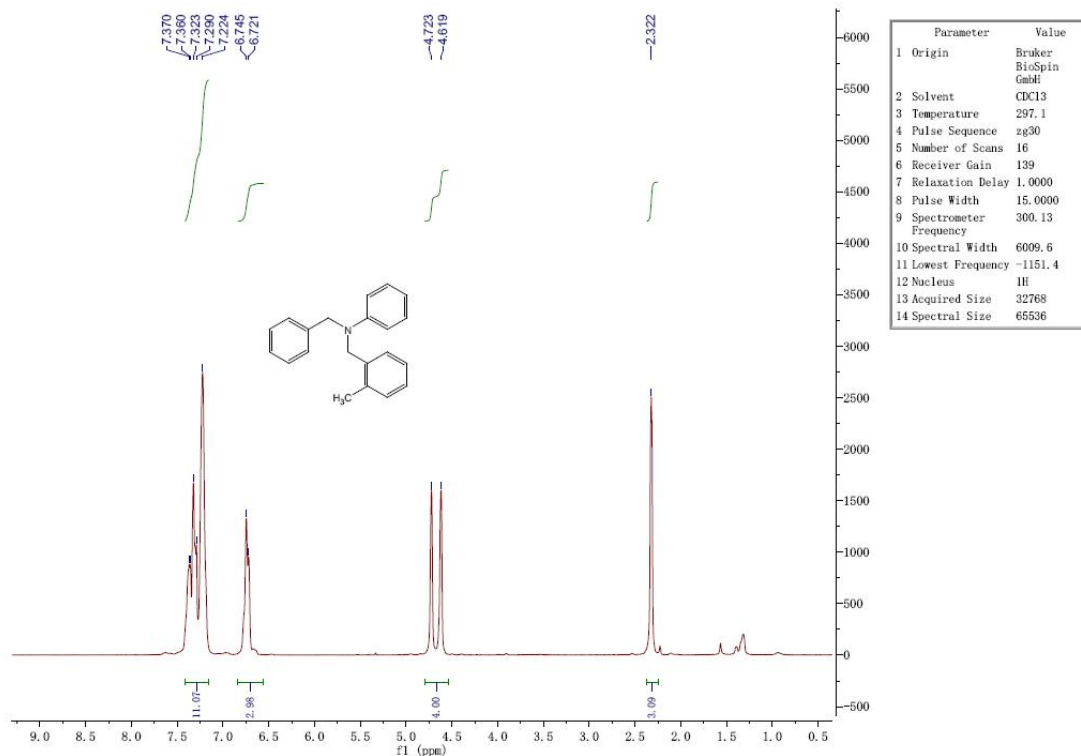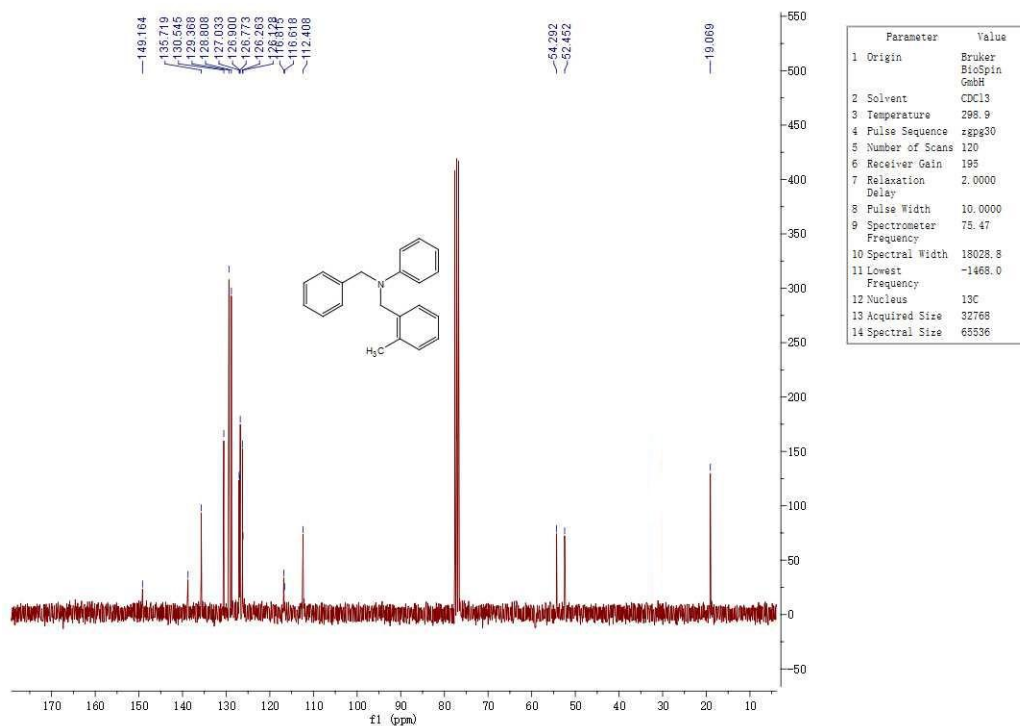

# N-benzyl-N-(4-bromobenzyl)aniline (3f)

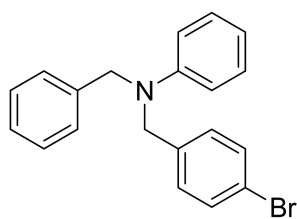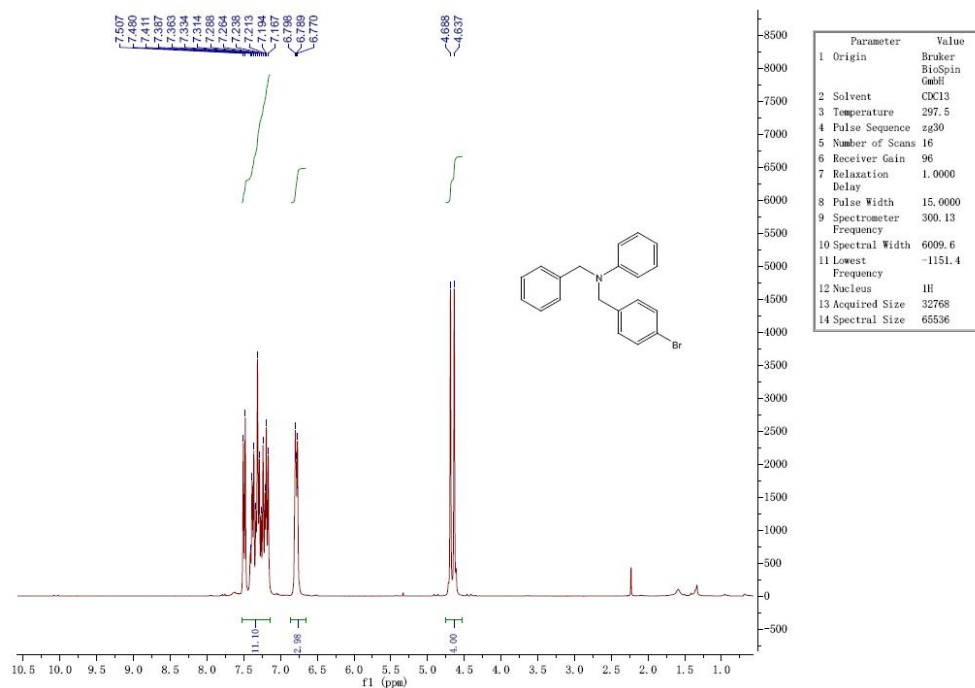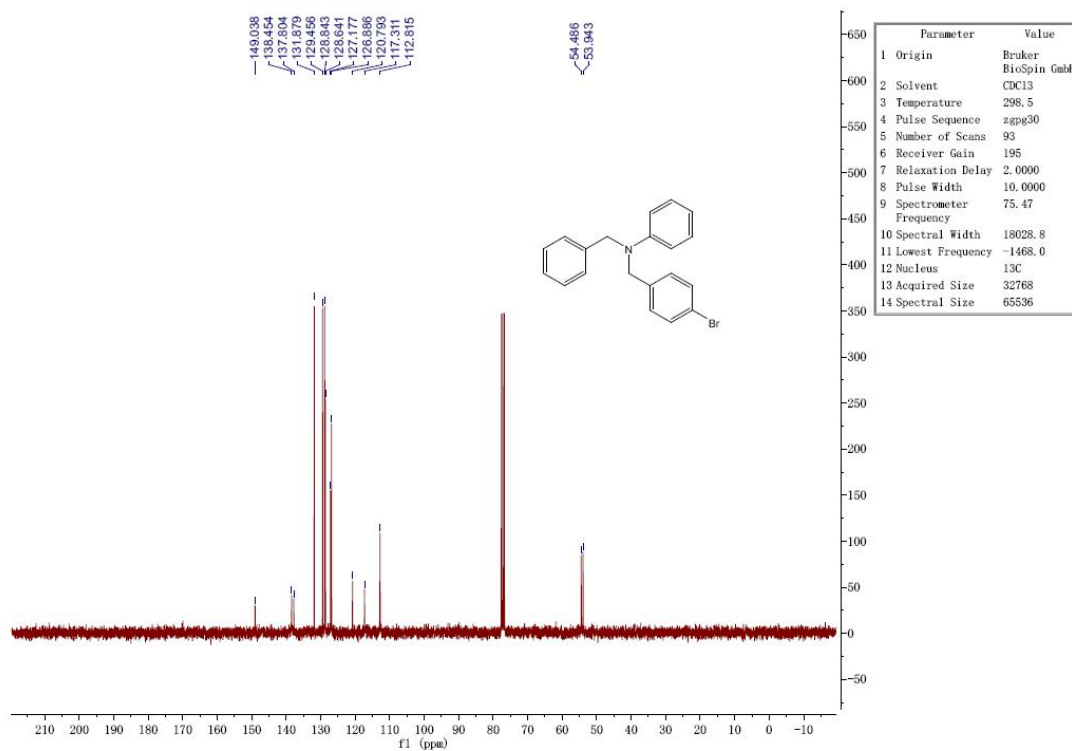

# N-benzyl-N-(4-fluorobenzyl)aniline (3g)

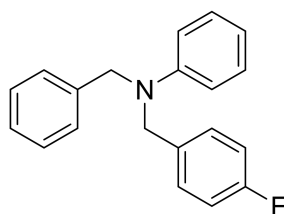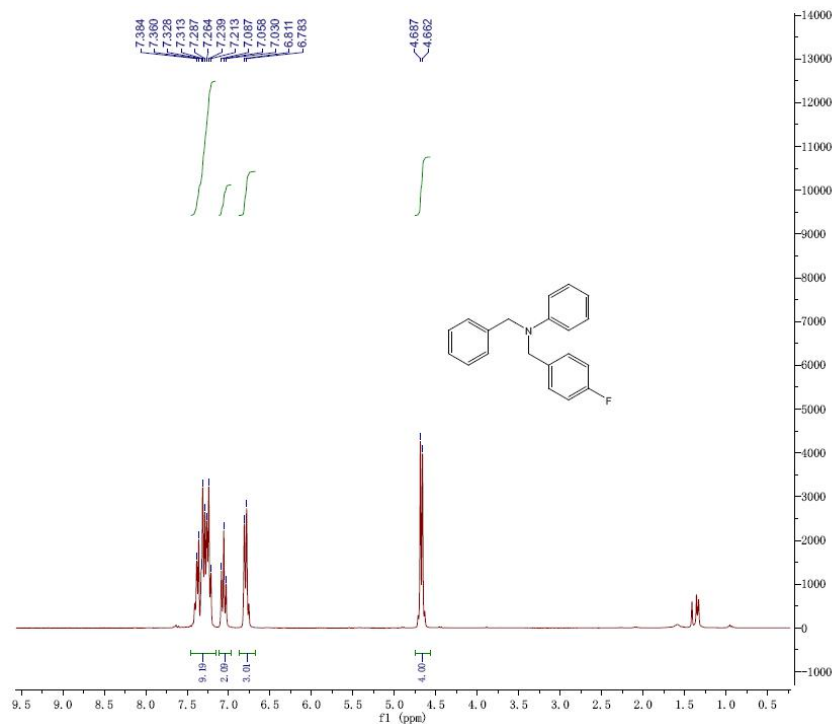

| Parameter                | Value               |
|--------------------------|---------------------|
| 1 Origin                 | Bruker BioSpin GmbH |
| 2 Solvent                | CDCl3               |
| 3 Temperature            | 297.7               |
| 4 Pulse Sequence         | zg30                |
| 5 Number of Scans        | 16                  |
| 6 Receiver Gain          | 96                  |
| 7 Relaxation Delay       | 1.0000              |
| 8 Pulse Width            | 15.0000             |
| 9 Spectrometer Frequency | 300.13              |
| 10 Spectral Width        | 6009.6              |
| 11 Lowest Frequency      | -1151.4             |
| 12 Nucleus               | <sup>1</sup> H      |
| 13 Acquired Size         | 32768               |
| 14 Spectral Size         | 65536               |

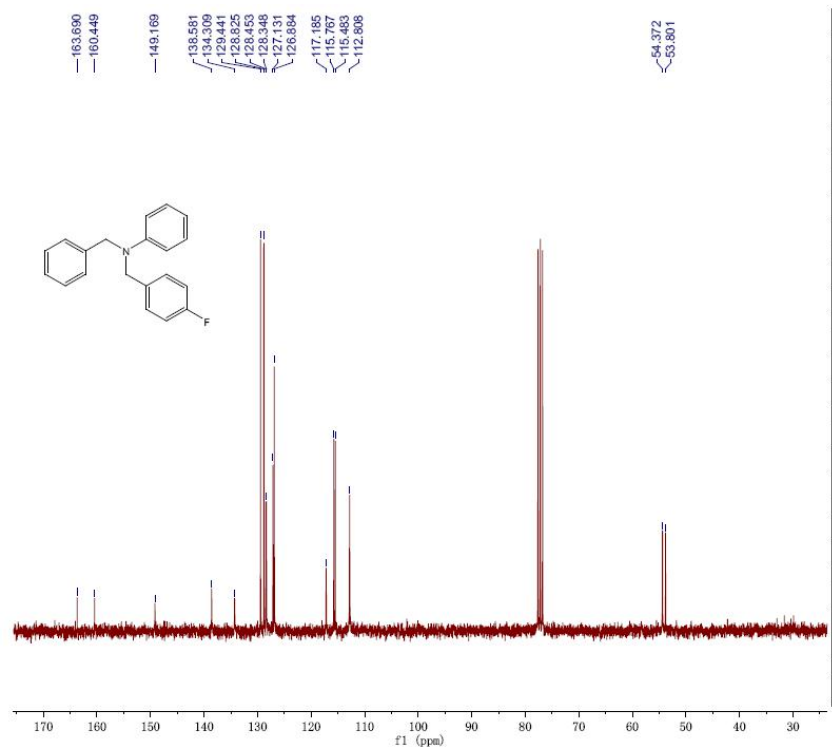

| Parameter                | Value               |
|--------------------------|---------------------|
| 1 Origin                 | Bruker BioSpin GmbH |
| 2 Solvent                | CDCl3               |
| 3 Temperature            | 298.6               |
| 4 Pulse Sequence         | zgpg30              |
| 5 Number of Scans        | 115                 |
| 6 Receiver Gain          | 195                 |
| 7 Relaxation Delay       | 2.0000              |
| 8 Pulse Width            | 10.0000             |
| 9 Spectrometer Frequency | 75.47               |
| 10 Spectral Width        | 18028.8             |
| 11 Lowest Frequency      | -1468.0             |
| 12 Nucleus               | <sup>13</sup> C     |
| 13 Acquired Size         | 32768               |
| 14 Spectral Size         | 65536               |



# N-benzyl-N-(2-fluorobenzyl)aniline (3h)

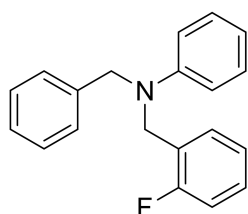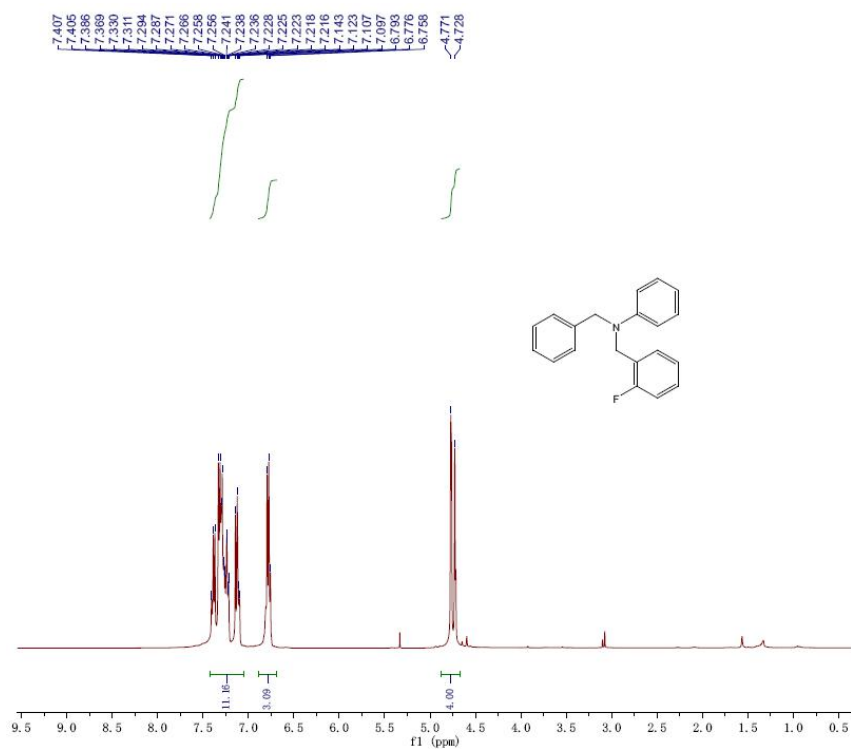

| Parameter                | Value                     |
|--------------------------|---------------------------|
| 1 Origin                 | Bruker<br>BioSpin<br>GmbH |
| 2 Solvent                | CDCl3                     |
| 3 Temperature            | 296.4                     |
| 4 Pulse Sequence         | zg30                      |
| 5 Number of Scans        | 16                        |
| 6 Receiver Gain          | 31                        |
| 7 Relaxation Delay       | 1.0000                    |
| 8 Pulse Width            | 9.6800                    |
| 9 Spectrometer Frequency | 400.13                    |
| 10 Spectral Width        | 8012.8                    |
| 11 Lowest Frequency      | -1535.4                   |
| 12 Nucleus               | 1H                        |
| 13 Acquired Size         | 32768                     |
| 14 Spectral Size         | 65536                     |

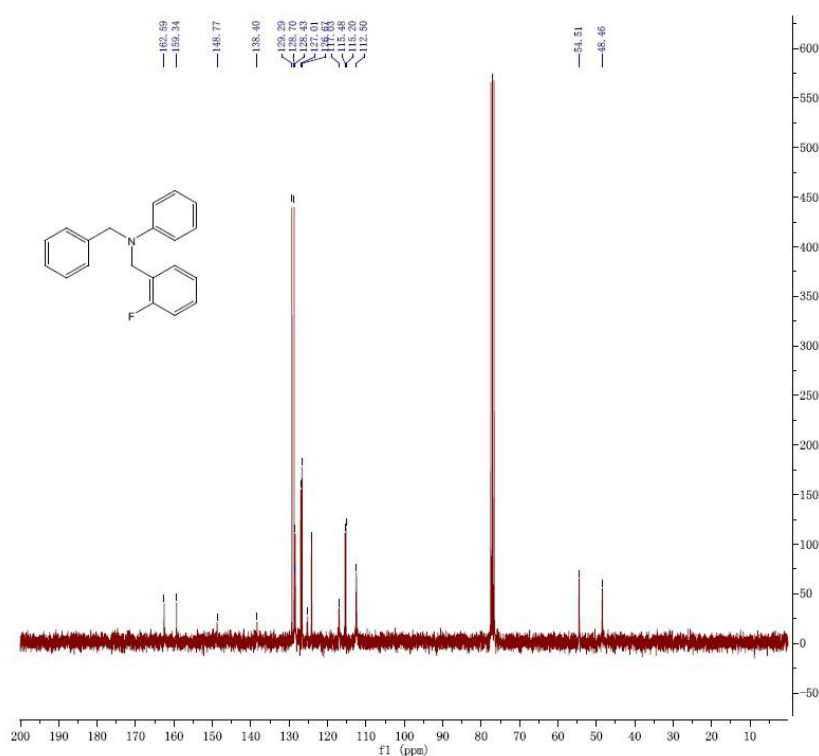

| Parameter                | Value                     |
|--------------------------|---------------------------|
| 1 Origin                 | Bruker<br>BioSpin<br>GmbH |
| 2 Solvent                | CDCl3                     |
| 3 Temperature            | 298.5                     |
| 4 Pulse Sequence         | zgpg30                    |
| 5 Number of Scans        | 161                       |
| 6 Receiver Gain          | 195                       |
| 7 Relaxation Delay       | 2.0000                    |
| 8 Pulse Width            | 10.0000                   |
| 9 Spectrometer Frequency | 75.47                     |
| 10 Spectral Width        | 18028.8                   |
| 11 Lowest Frequency      | -1468.0                   |
| 12 Nucleus               | 13C                       |
| 13 Acquired Size         | 32768                     |
| 14 Spectral Size         | 65536                     |

### N-benzyl-N-(2-chlorobenzyl)aniline (3i)

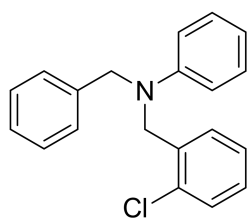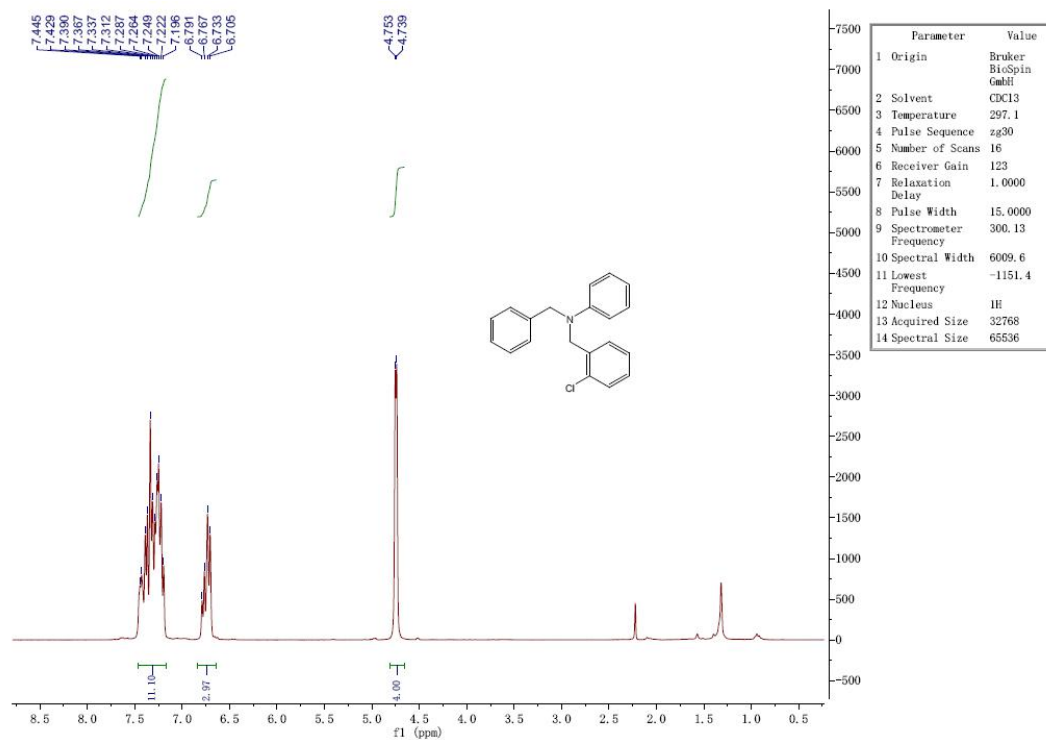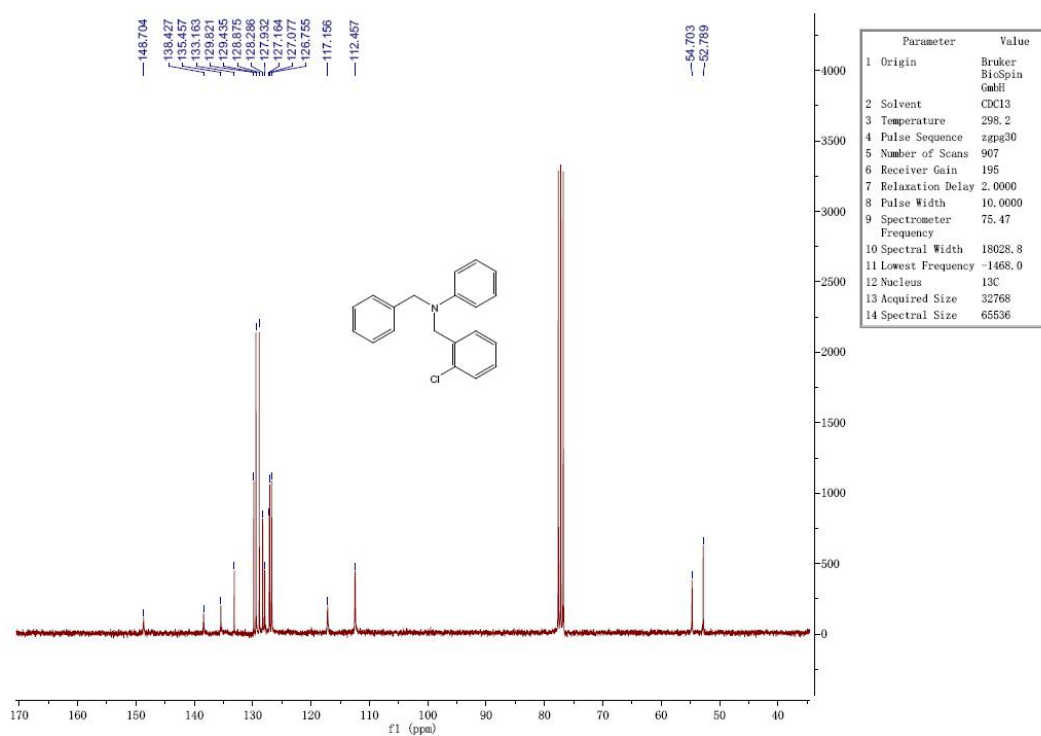

### N-benzyl-N-pentylaniline (3j)

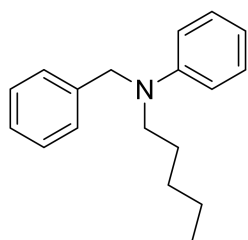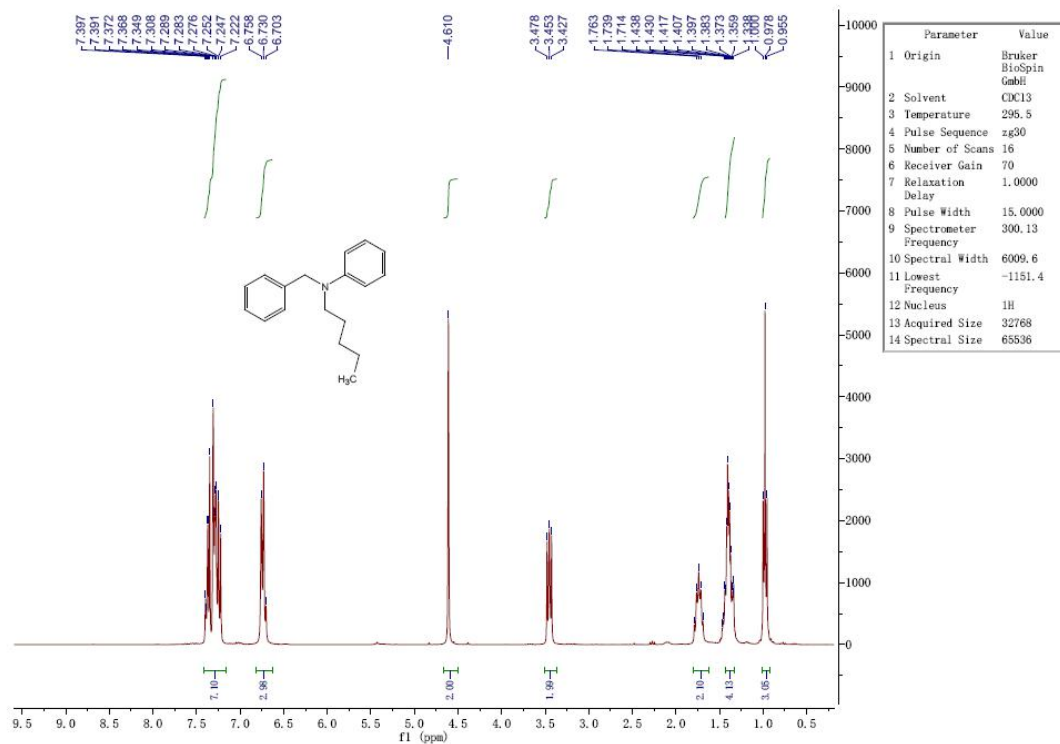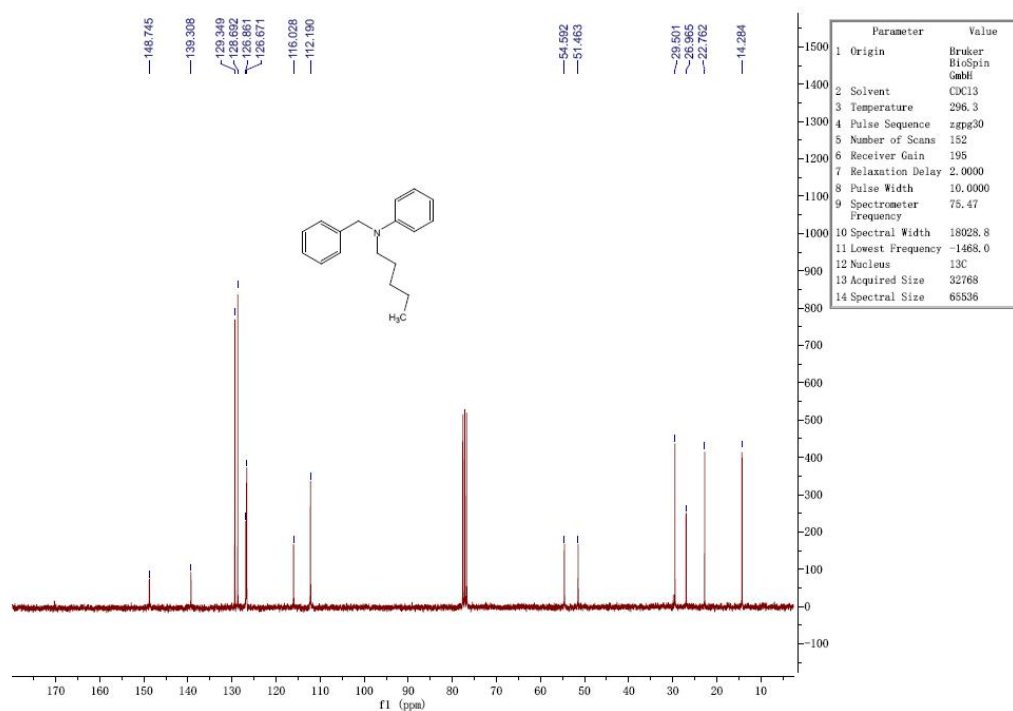

***N*-benzyl-*N*-(thiophen-2-ylmethyl)aniline (3k)**

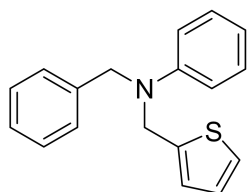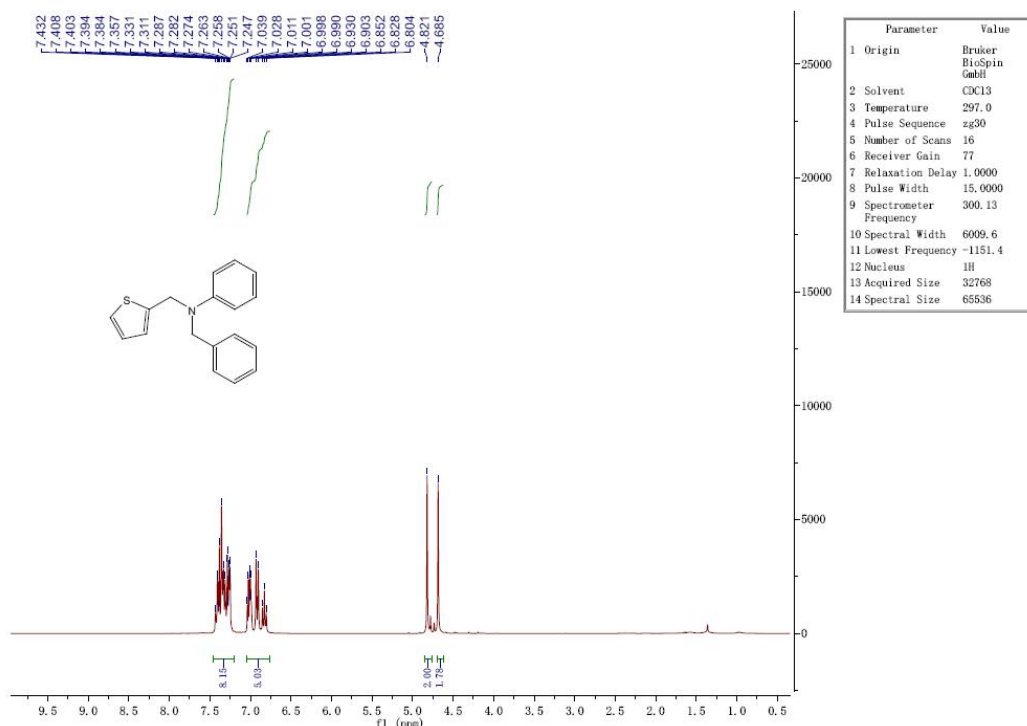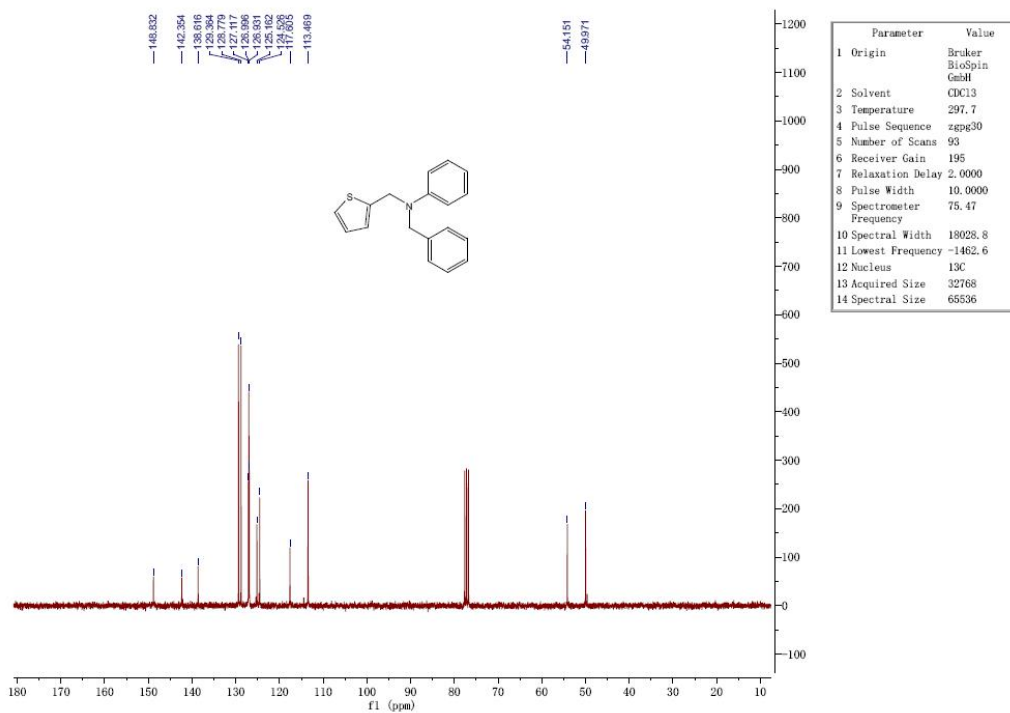

***N*-benzyl-*N*-(furan-2-ylmethyl)aniline (3l)**

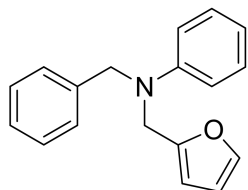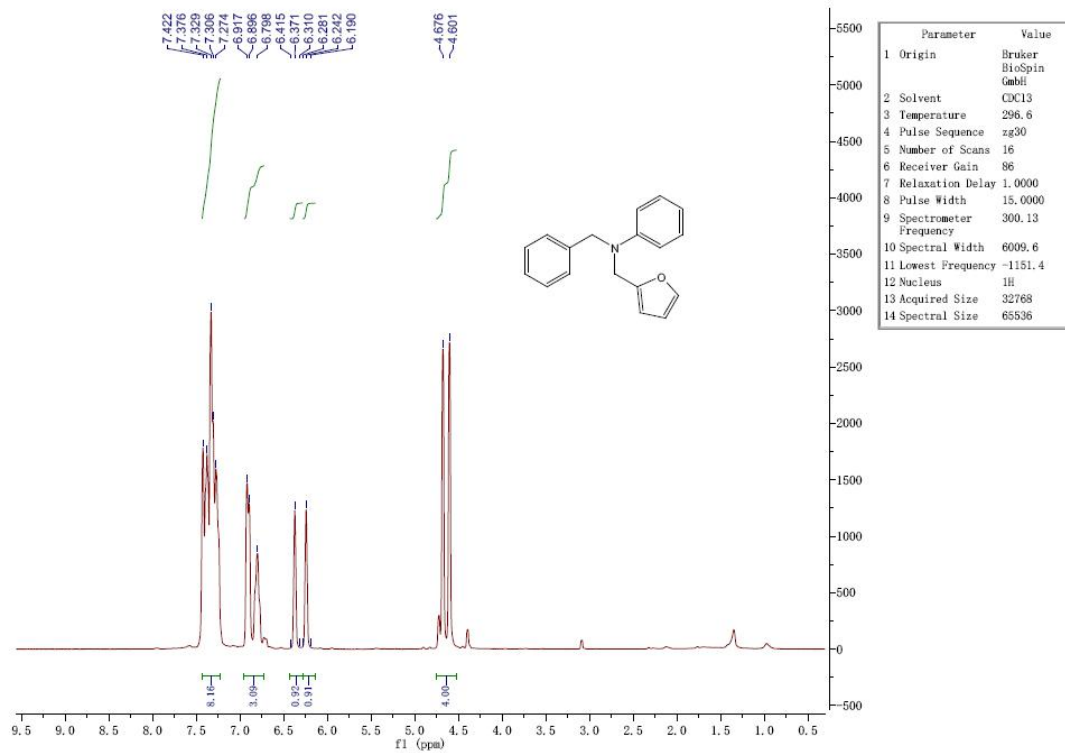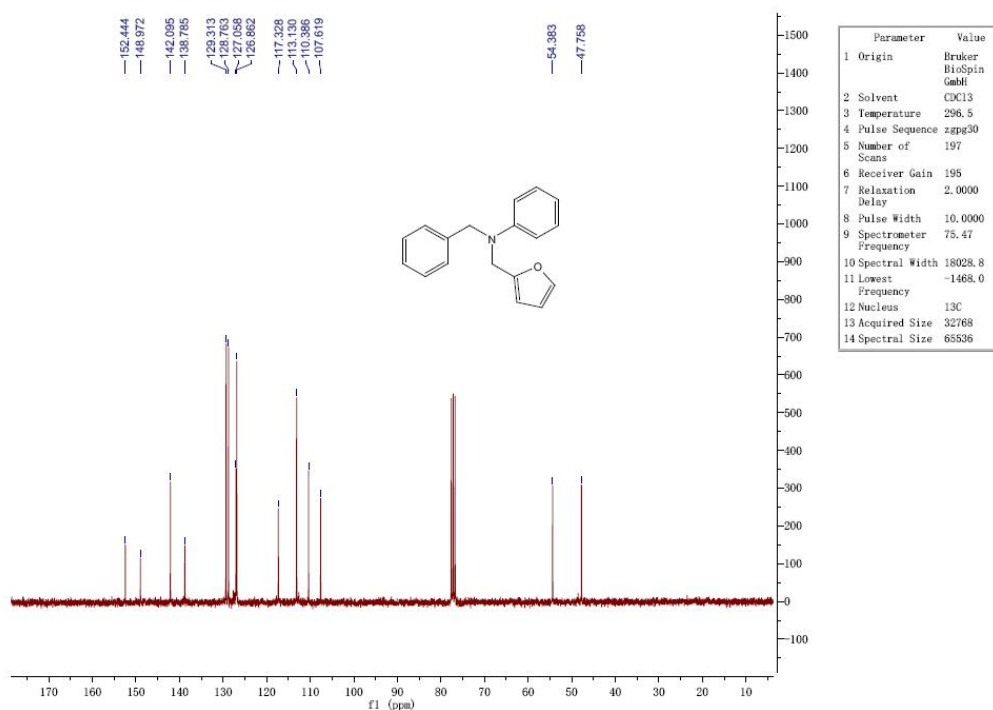

# N-benzyl-N-((3-chloropyridin-4-yl)methyl)aniline (3m)

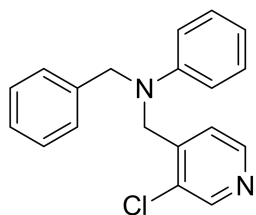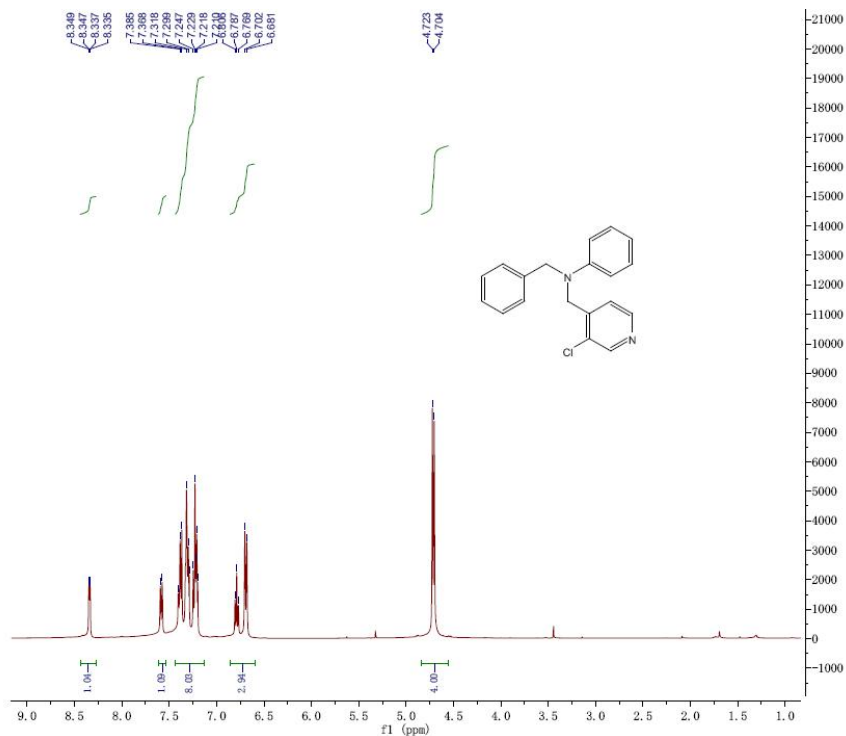

| Parameter                | Value               |
|--------------------------|---------------------|
| 1 Origin                 | Bruker BioSpin GmbH |
| 2 Solvent                | CDCl3               |
| 3 Temperature            | 296.3               |
| 4 Pulse Sequence         | zg30                |
| 5 Number of Scans        | 16                  |
| 6 Receiver Gain          | 57                  |
| 7 Relaxation Delay       | 1.0000              |
| 8 Pulse Width            | 9.6800              |
| 9 Spectrometer Frequency | 400.13              |
| 10 Spectral Width        | 8012.8              |
| 11 Lowest Frequency      | -1535.4             |
| 12 Nucleus               | 1H                  |
| 13 Acquired Size         | 32768               |
| 14 Spectral Size         | 65536               |

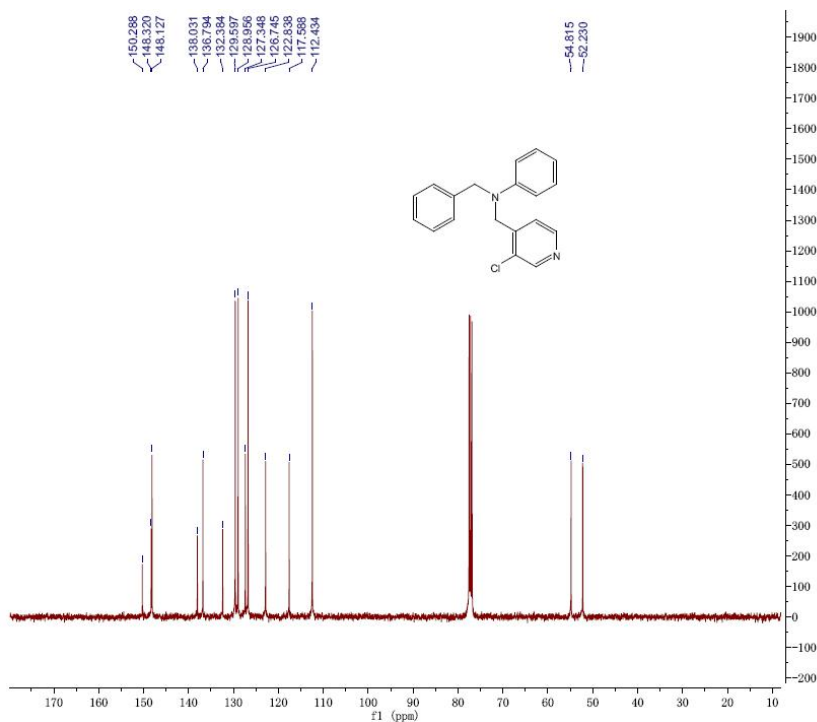

| Parameter                | Value               |
|--------------------------|---------------------|
| 1 Origin                 | Bruker BioSpin GmbH |
| 2 Solvent                | CDCl3               |
| 3 Temperature            | 296.9               |
| 4 Pulse Sequence         | zgpg30              |
| 5 Number of Scans        | 300                 |
| 6 Receiver Gain          | 208                 |
| 7 Relaxation Delay       | 2.0000              |
| 8 Pulse Width            | 9.9500              |
| 9 Spectrometer Frequency | 100.62              |
| 10 Spectral Width        | 24038.5             |
| 11 Lowest Frequency      | -1958.0             |
| 12 Nucleus               | 13C                 |
| 13 Acquired Size         | 32768               |
| 14 Spectral Size         | 65536               |

# N-(furan-2-ylmethyl)-N-(4-methoxybenzyl)aniline (3n)

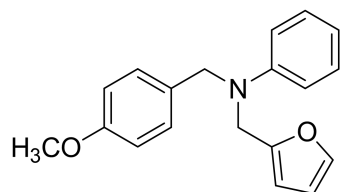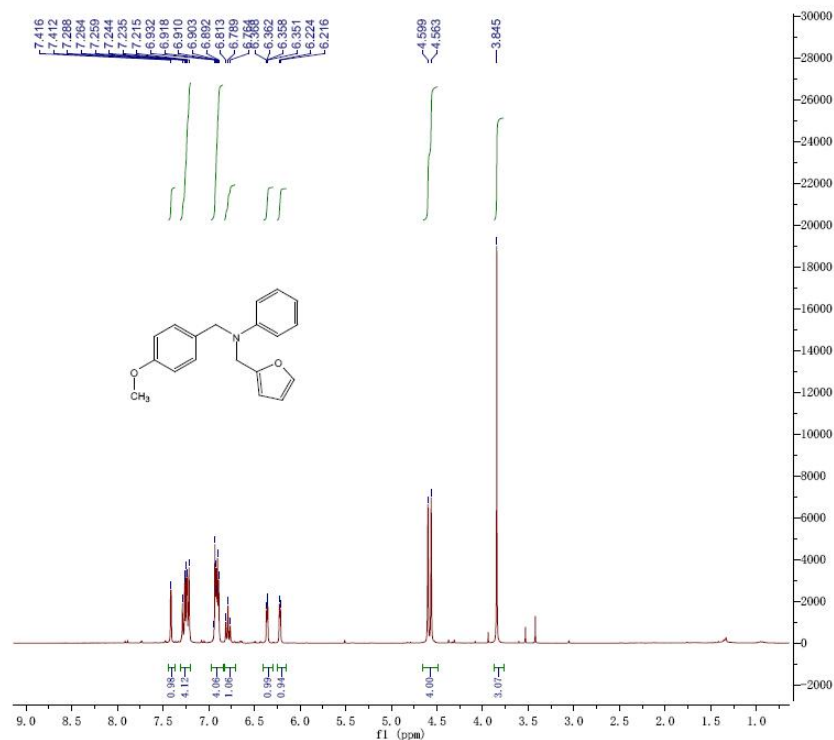

| Parameter                | Value               |
|--------------------------|---------------------|
| 1 Origin                 | Bruker BioSpin GmbH |
| 2 Solvent                | CDCl3               |
| 3 Temperature            | 295.5               |
| 4 Pulse Sequence         | zg30                |
| 5 Number of Scans        | 16                  |
| 6 Receiver Gain          | 77                  |
| 7 Relaxation Delay       | 1.0000              |
| 8 Pulse Width            | 15.0000             |
| 9 Spectrometer Frequency | 300.13              |
| 10 Spectral Width        | 6009.6              |
| 11 Lowest Frequency      | -1151.4             |
| 12 Nucleus               | 1H                  |
| 13 Acquired Size         | 32768               |
| 14 Spectral Size         | 65536               |

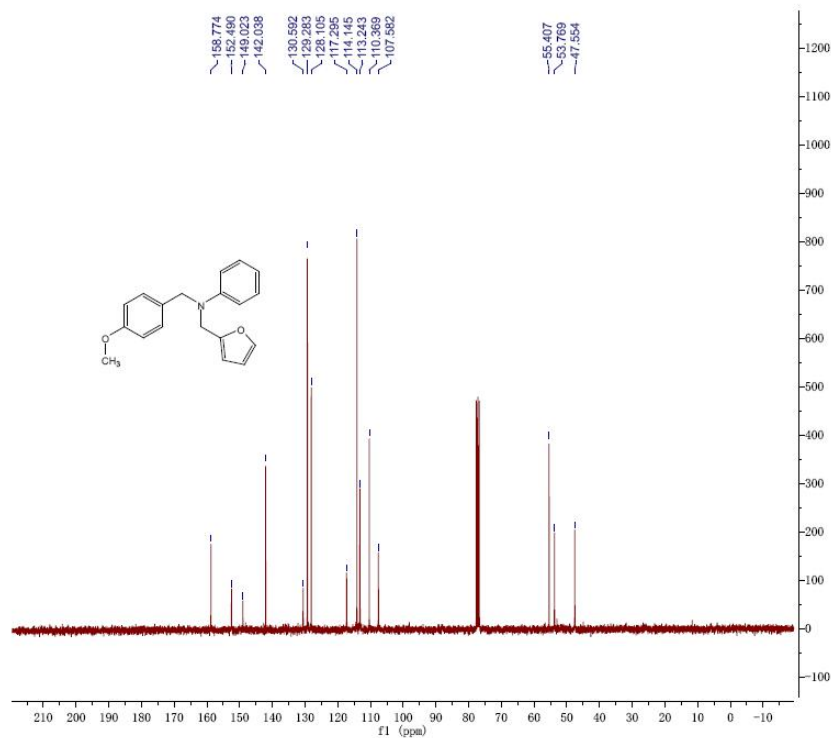

| Parameter                | Value               |
|--------------------------|---------------------|
| 1 Origin                 | Bruker BioSpin GmbH |
| 2 Solvent                | CDCl3               |
| 3 Temperature            | 296.3               |
| 4 Pulse Sequence         | zpg30               |
| 5 Number of Scans        | 139                 |
| 6 Receiver Gain          | 195                 |
| 7 Relaxation Delay       | 2.0000              |
| 8 Pulse Width            | 10.0000             |
| 9 Spectrometer Frequency | 75.47               |
| 10 Spectral Width        | 18028.8             |
| 11 Lowest Frequency      | -1468.0             |
| 12 Nucleus               | 13C                 |
| 13 Acquired Size         | 32768               |
| 14 Spectral Size         | 65536               |

# N-(4-methoxybenzyl)-N-pentylaniline (3o)

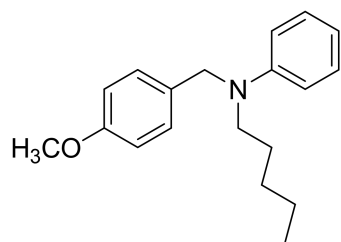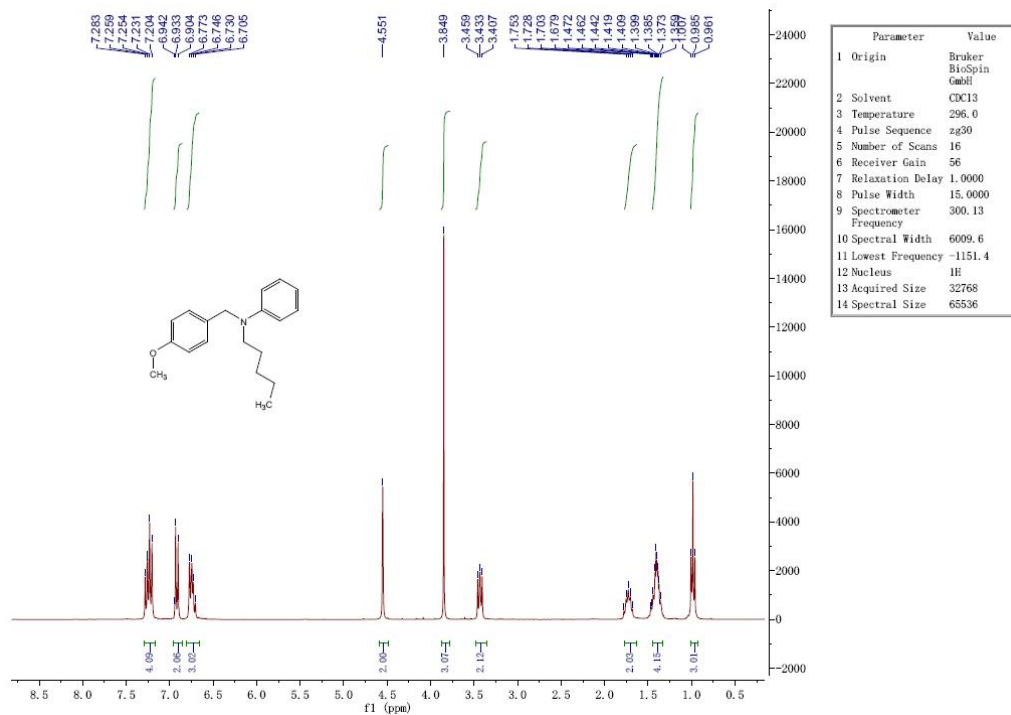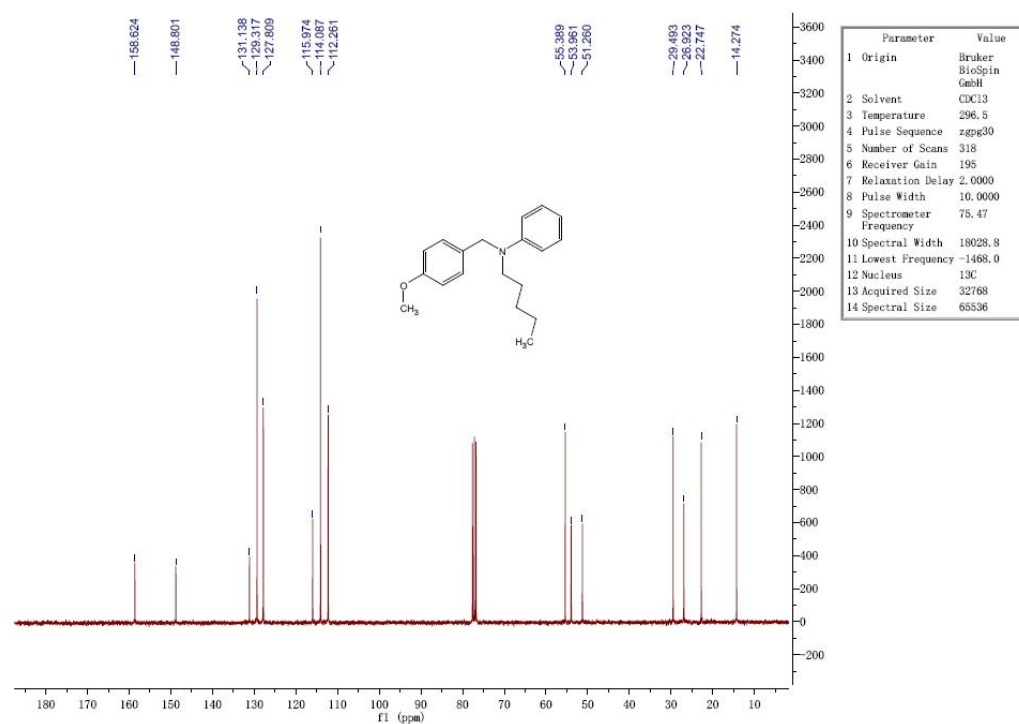



# *N,N*-dibenzyl-4-bromoaniline (3p)

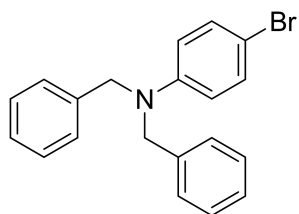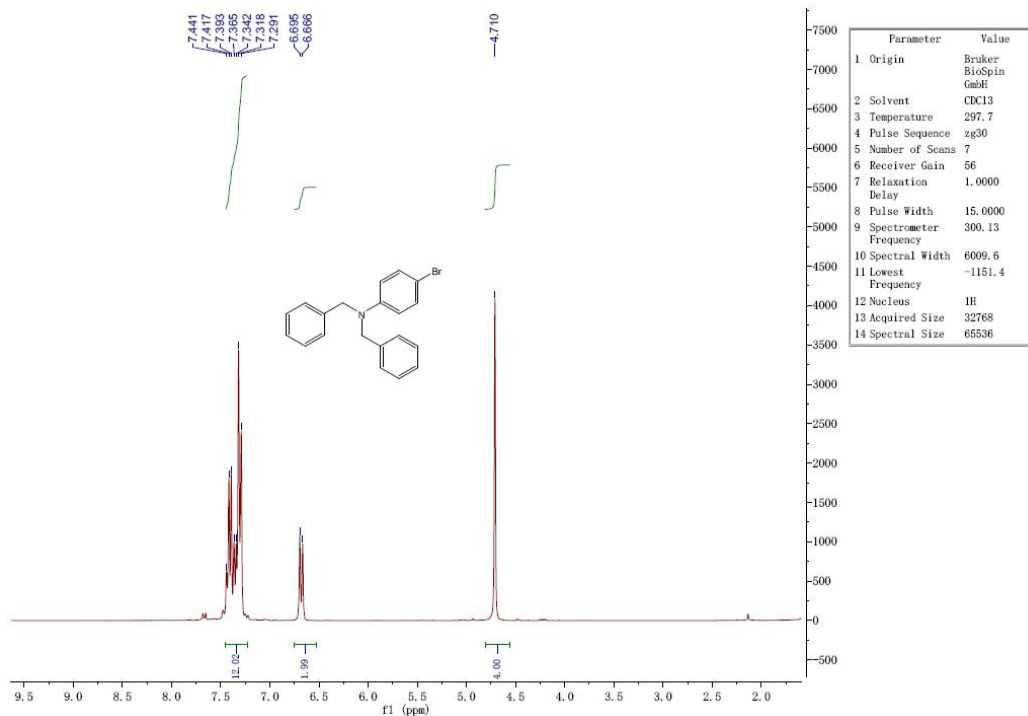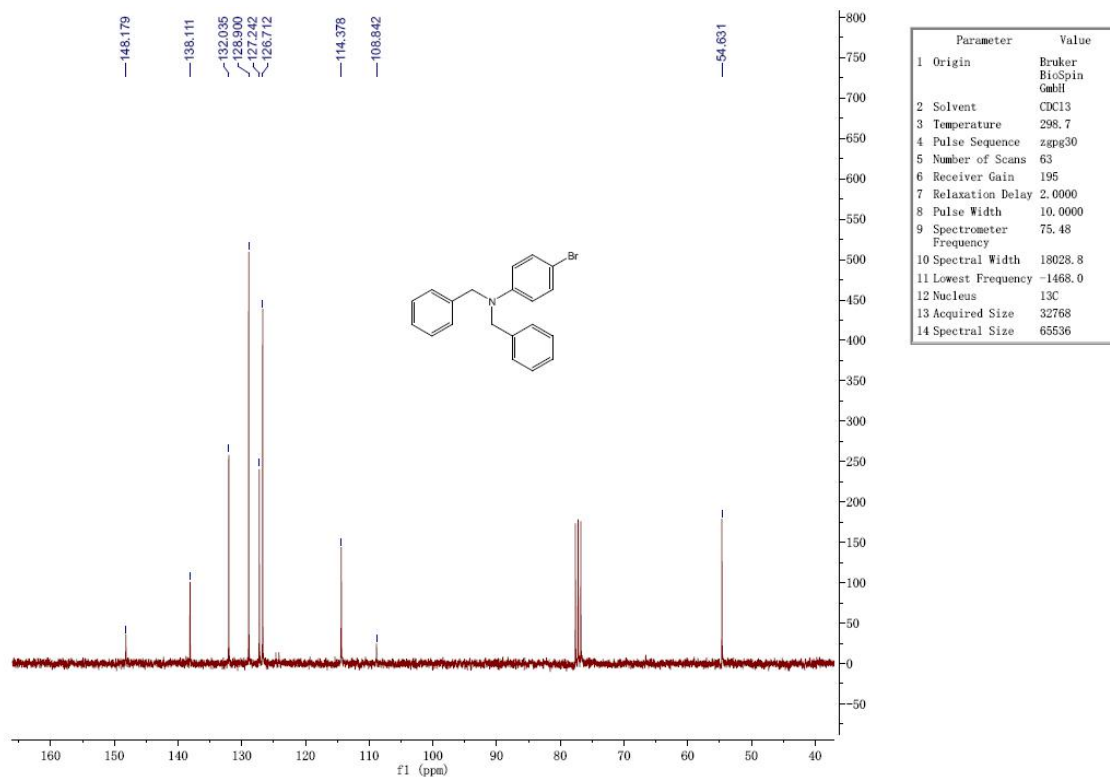

# N-benzyl-4-bromo-N-(4-methylbenzyl)aniline (3q)

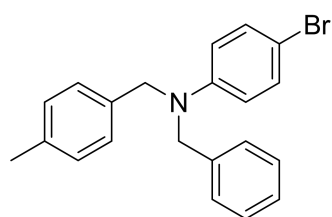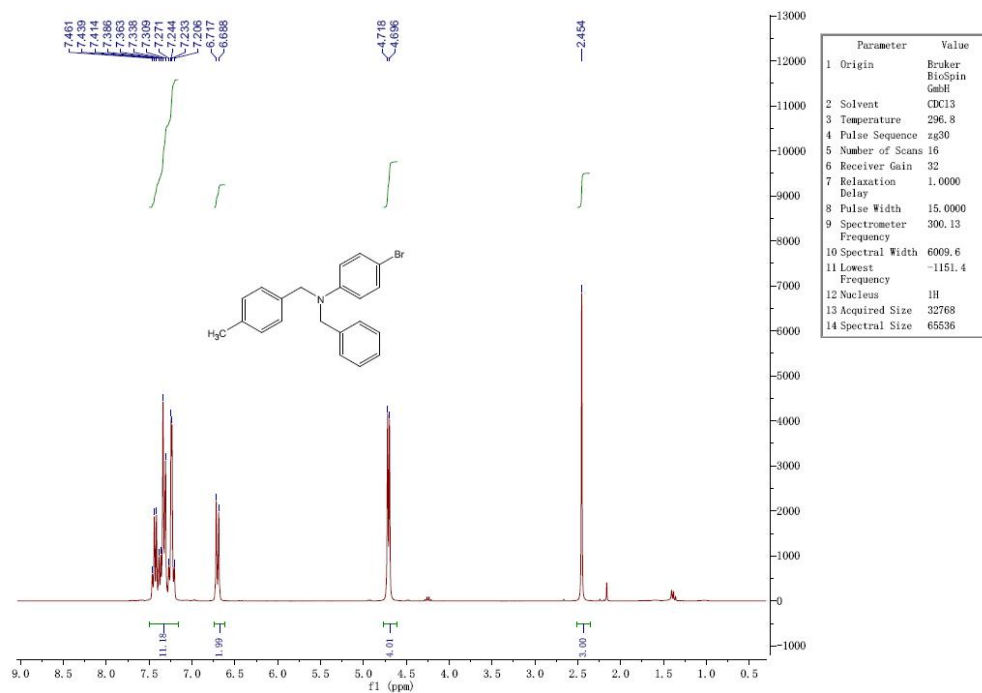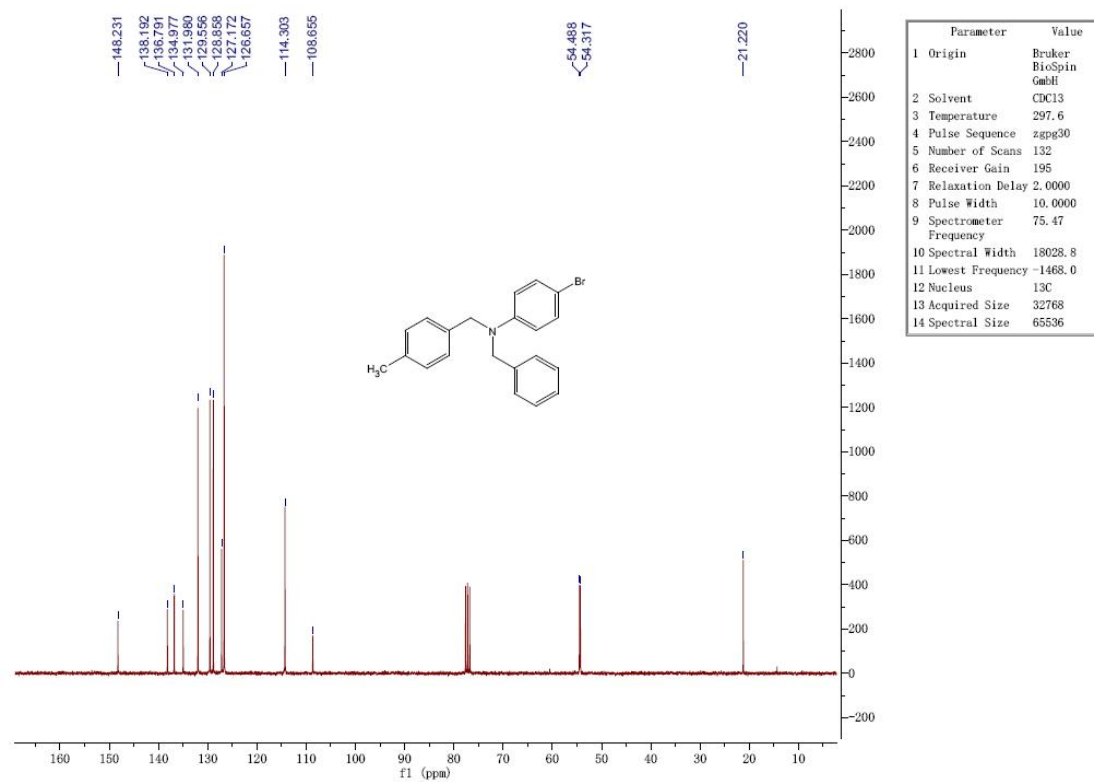

### Methyl 4-((benzyl(*p*-tolyl)amino)methyl)benzoate (3r)

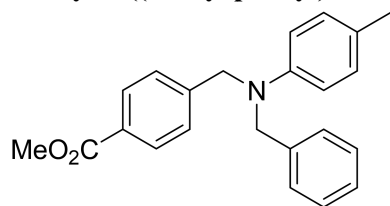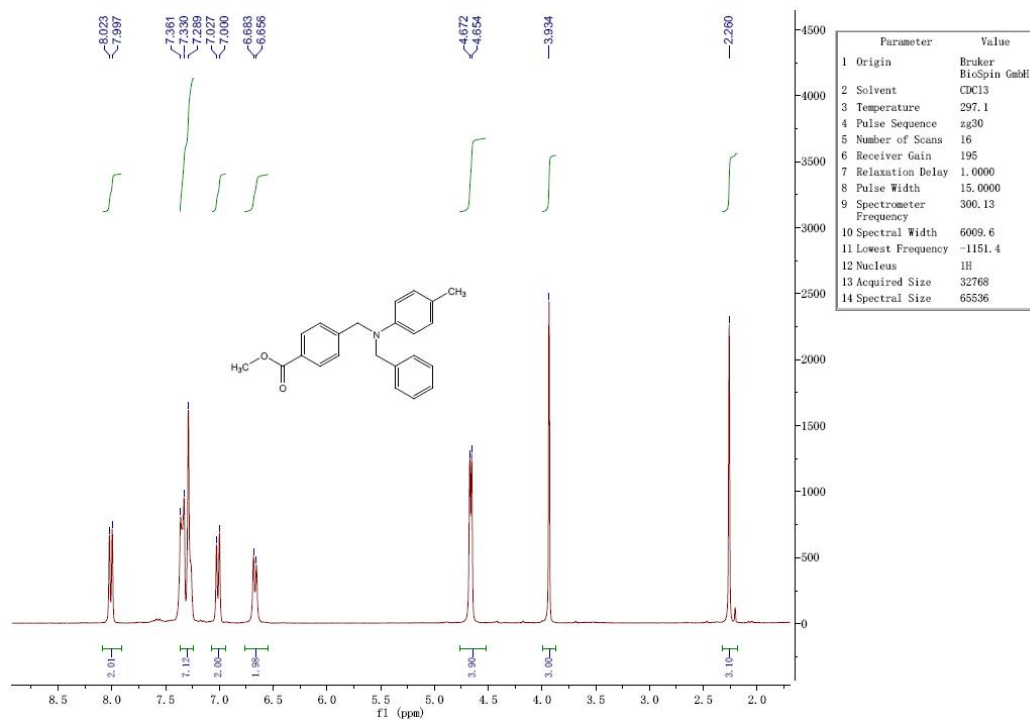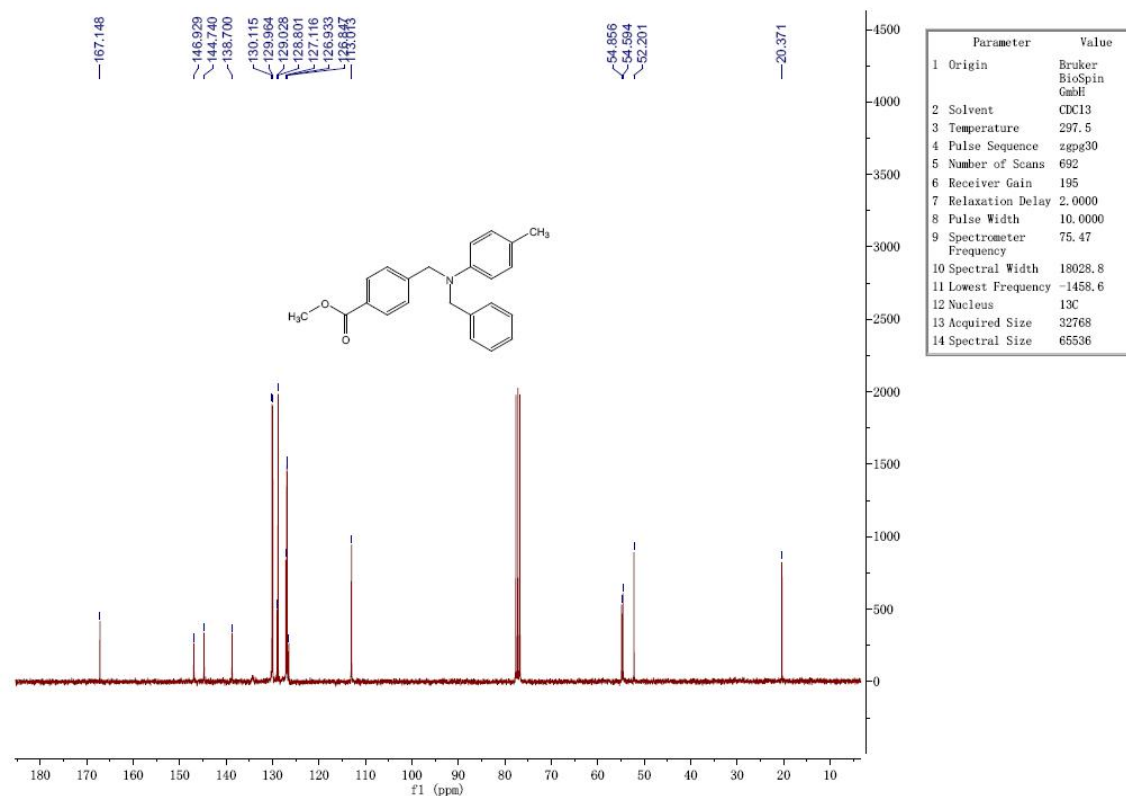

# N-((5-methylthiophen-2-yl)methyl)-N-pentylaniline (3s)

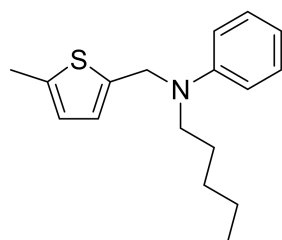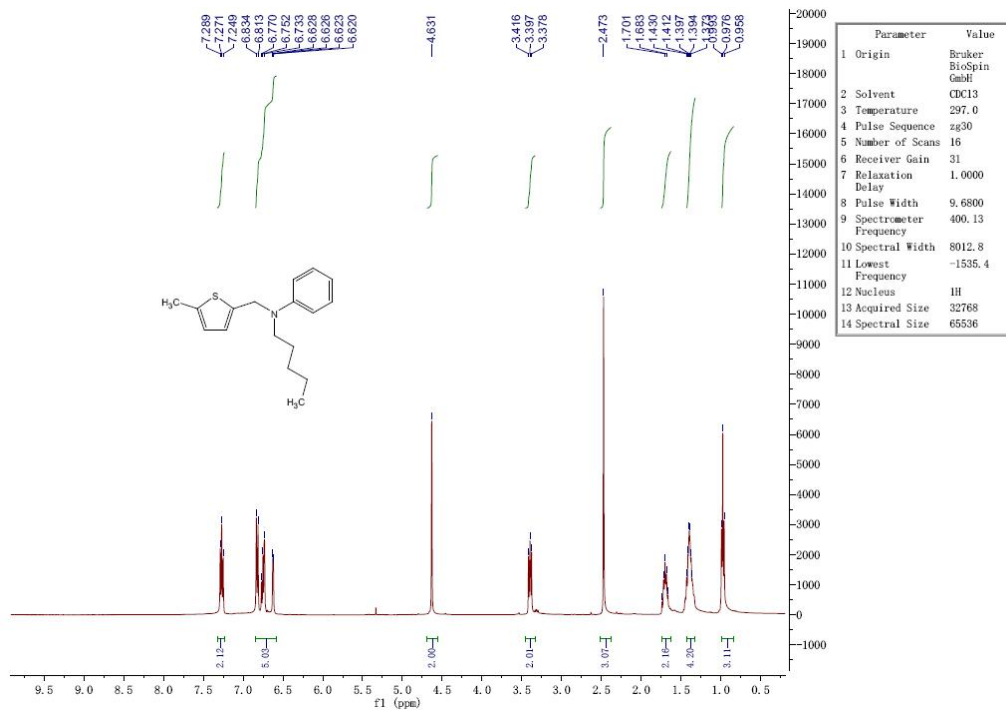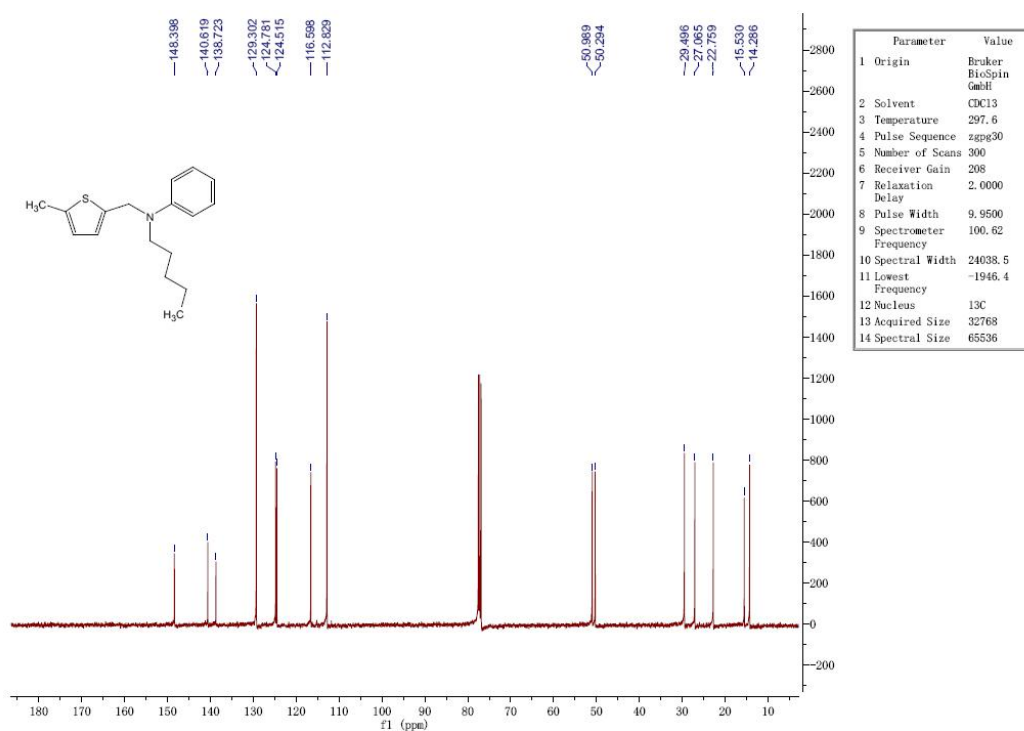

# Tribenzylamine (3t)

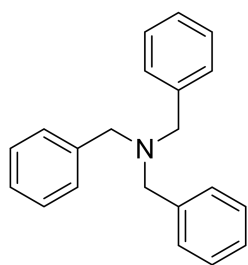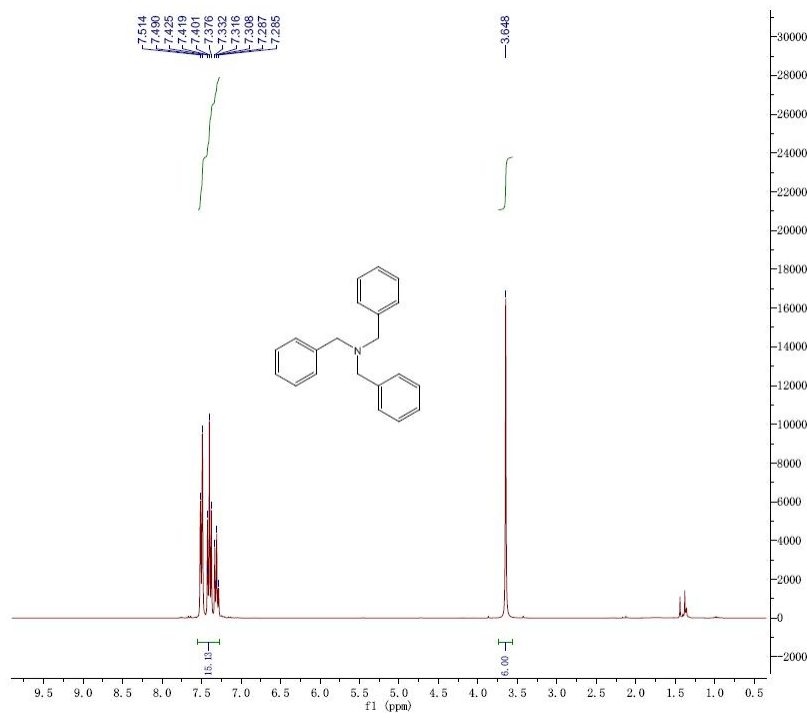

| Parameter           | Value               |
|---------------------|---------------------|
| 1 Origin            | Bruker BioSpin GmbH |
| 2 Solvent           | CDCl <sub>3</sub>   |
| 3 Temperature       | 296.8               |
| 4 Pulse Sequence    | zg30                |
| 5 Number of Scans   | 16                  |
| 6 Receiver Gain     | 77                  |
| 7 Relaxation Delay  | 1.0000              |
| 8 Pulse Width       | 15.0000             |
| 9 Spectrometer      | 300.13              |
| Frequency           |                     |
| 10 Spectral Width   | 6099.6              |
| 11 Lowest Frequency | -1151.4             |
| 12 Nucleus          | <sup>1</sup> H      |
| 13 Acquired Size    | 32768               |
| 14 Spectral Size    | 65536               |

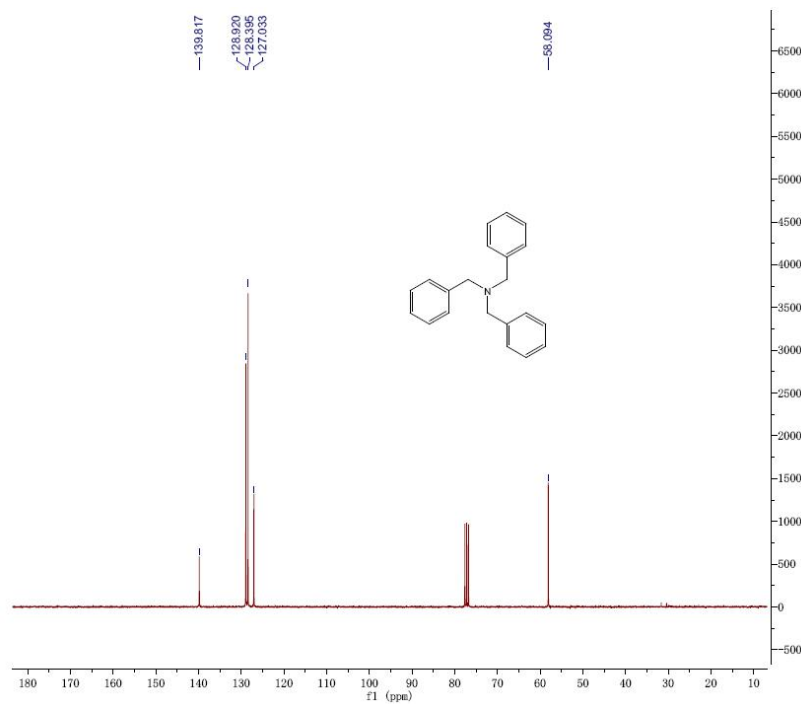

| Parameter           | Value               |
|---------------------|---------------------|
| 1 Origin            | Bruker BioSpin GmbH |
| 2 Solvent           | CDCl <sub>3</sub>   |
| 3 Temperature       | 297.9               |
| 4 Pulse Sequence    | zgpg30              |
| 5 Number of Scans   | 272                 |
| 6 Receiver Gain     | 195                 |
| 7 Relaxation Delay  | 2.0000              |
| 8 Pulse Width       | 10.0000             |
| 9 Spectrometer      | 75.47               |
| Frequency           |                     |
| 10 Spectral Width   | 18028.8             |
| 11 Lowest Frequency | -1468.0             |
| 12 Nucleus          | <sup>13</sup> C     |
| 13 Acquired Size    | 32768               |
| 14 Spectral Size    | 65536               |

### *N,N*-dibenzyl-2-methylpropan-1-amine (3u)

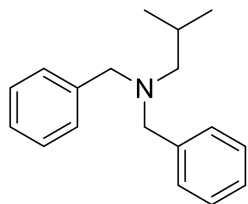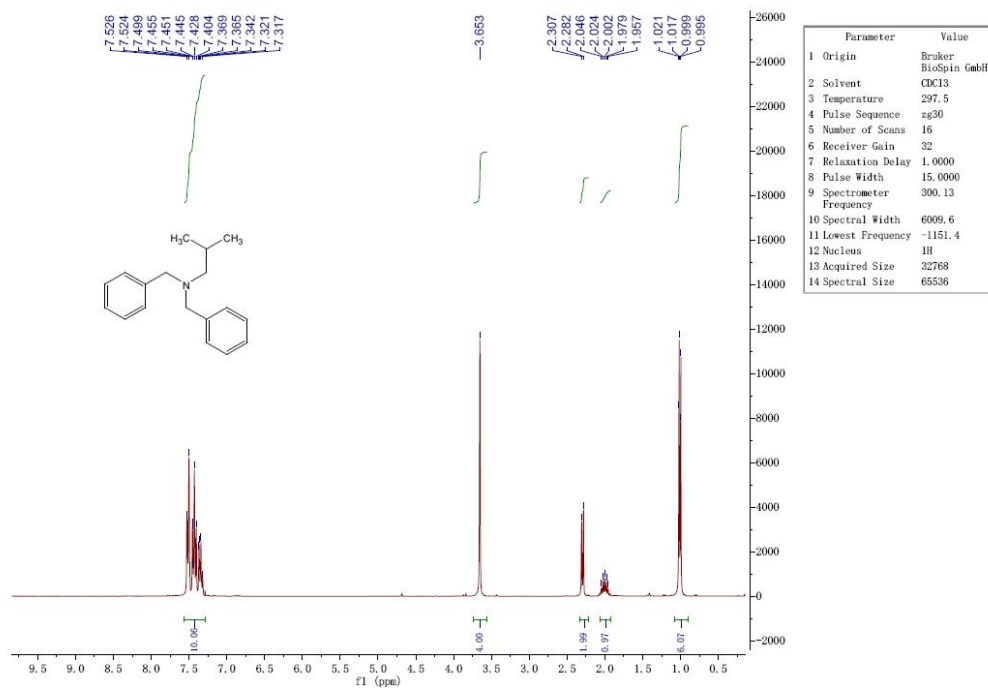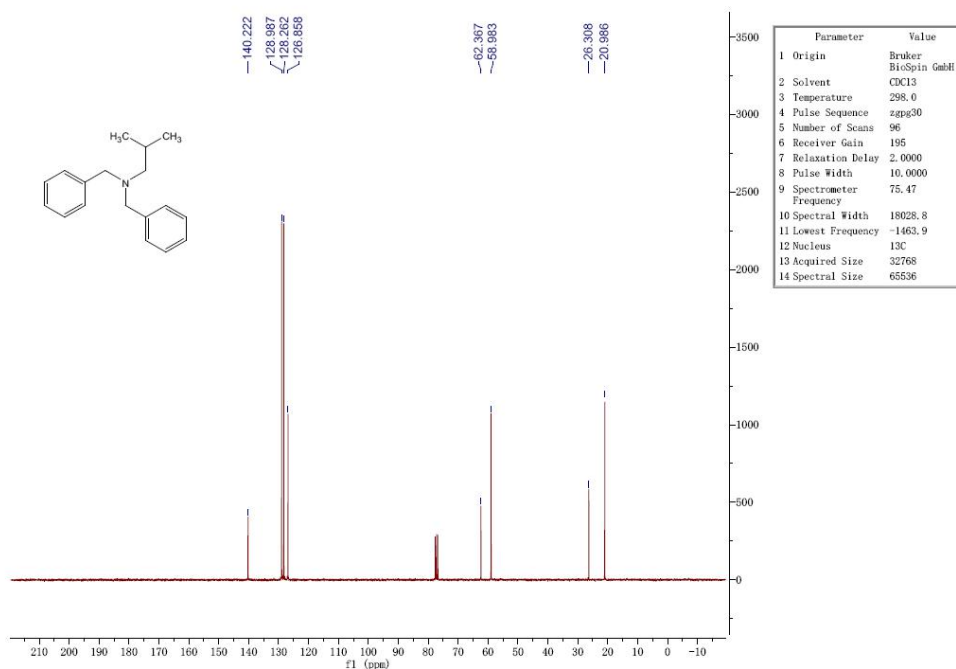

Supplement: c8cc05437a1.pdf [file c8cc05437a1.pdf]
